# Supplementary material
Source: publisher figshare collection journal article supplement (https://tandf.figshare.com/ndownloader/files/35118736)
Supplement: Supplementary file 1 [file 35118736]

## SUPPLEMENTARY MATERIAL

### New compounds from the stems of *Fissistigma acuminatissimum* Merr. and their anti-inflammatory activity in vitro

Chen Jin<sup>a</sup>, Ling Zhang<sup>a</sup>, Cheng-Jun Yuan<sup>b</sup>, Yi Liu<sup>a</sup>, Hui-Zhen Liu<sup>a</sup>, Bo-Lun Xu<sup>a</sup>, Ji-Cheng Shu<sup>a</sup>, Xiao-Yu Zhang<sup>a</sup>, Si-Yi Wang<sup>a</sup> and Hui-Lian Huang<sup>a</sup>

<sup>a</sup>Key Laboratory of Modern Preparation of TCM, Jiangxi University of Chinese Medicine, Ministry of Education, Nanchang, People's Republic of China

<sup>b</sup>School of Pharmacy, China Pharmaceutical University, Nanjing, People's Republic of China

#### Corresponding author:

Prof. Hui-Lian Huang; Phone: +86-0791-87118658; E-mail: [huilianh@163.com](mailto:huilianh@163.com)

#### Abstract

Three new compounds, 4,5,6,7-tetramethoxy-3-benzoylbenzofuran (**1**), 4-hydroxy-3,5,6-trimethoxydihydrochalcone-2-O- $\beta$ -D-glucopyranoside (**2**) and 2-hydroxy-3,4,5,6-tetramethoxyphenylethyl benzoate (**3**) along with five known flavonoids were isolated from the dichloromethane fraction of the stems of *Fissistigma acuminatissimum* Merr.'s ethanol extracts. The compounds were obtained by various classical column chromatographic methods, and the structure elucidation was completed primarily on the basis of spectroscopic analyses including UV, 1D, 2D-NMR and HR-ESI-MS. All of these compounds were isolated from *F. acuminatissimum* for the first time. All the fractions and compounds were evaluated for their anti-inflammatory activity against lipopolysaccharide (LPS)-stimulated tumor necrosis factor  $\alpha$  (TNF- $\alpha$ ) production in RAW264.7 cells in vitro. The dichloromethane fraction showed the most potent inhibition(38.2%) at 60  $\mu$ g/mL, compound **1** (70.2%) and **3** (65.2%) showed significant inhibition at 10  $\mu$ M.

**Keywords:** *Fissistigma acuminatissimum* Merr.; 3-benzoylbenzofuran; dihydrochalcone; phenylethyl benzoate; anti-inflammatory activity

## List of Supplementary Material

**Table S1**  $^1\text{H}$  and  $^{13}\text{C}$  NMR spectroscopic data for compounds **1** and **3**

**Table S2**  $^1\text{H}$  and  $^{13}\text{C}$  NMR spectroscopic data for compounds **2**

**Table S3**  $^1\text{H}$  and  $^{13}\text{C}$  NMR spectroscopic data for compounds **4** and **5**

**Table S4**  $^1\text{H}$  and  $^{13}\text{C}$  NMR spectroscopic data for compounds **6**, **7** and **8**

**Table S5** The cell survival rate under the influence of tested fractions (n=3)

**Table S6** Inhibitory activity against TNF- $\alpha$  of tested fractions and compounds (n=3)

**Figure S1** Key HMBC and NOESY correlations of compounds **1-3**

**Figure S2**  $^1\text{H}$ -NMR spectrum for Compound **1** (DMSO- $d_6$ )

**Figure S3**  $^{13}\text{C}$ -NMR spectrum for Compound **1** (DMSO- $d_6$ )

**Figure S4** HSQC spectrum for Compound **1** (DMSO- $d_6$ )

**Figure S5** HSQC spectrum for Compound **1-a** (DMSO- $d_6$ )

**Figure S6** HMBC spectrum for Compound **1** (DMSO- $d_6$ )

**Figure S7** HMBC spectrum for Compound **1-a** (DMSO- $d_6$ )

**Figure S8** NOESY spectrum for Compound **1** (DMSO- $d_6$ )

**Figure S9** NOESY spectrum for Compound **1-a** (DMSO- $d_6$ )

**Figure S10** NOESY spectrum for Compound **1-b** (DMSO- $d_6$ )

**Figure S11** NOESY spectrum for Compound **1-c** (DMSO- $d_6$ )

**Figure S12** MS spectrum for Compound **1**

**Figure S13** UV spectrum for Compound **1**

**Figure S14**  $^1\text{H}$ -NMR spectrum for Compound **2** (DMSO- $d_6$ )

**Figure S15**  $^{13}\text{C}$ -NMR spectrum for Compound **2** (DMSO- $d_6$ )

**Figure S16** HSQC spectrum for Compound **2** (DMSO- $d_6$ )

**Figure S17** HSQC spectrum for Compound **2-a** (DMSO- $d_6$ )

**Figure S18** HSQC spectrum for Compound **2-b** (DMSO- $d_6$ )

**Figure S19** HSQC spectrum for Compound **2-c** (DMSO- $d_6$ )

**Figure S20** HMBC spectrum for Compound **2** (DMSO- $d_6$ )

**Figure S21** HMBC spectrum for Compound **2-a** (DMSO- $d_6$ )

**Figure S22** HMBC spectrum for Compound **2-b** (DMSO- $d_6$ )

**Figure S23** HMBC spectrum for Compound **2-c** (DMSO- $d_6$ )

**Figure S24** HMBC spectrum for Compound **2-d** (DMSO- $d_6$ )

**Figure S25** NOESY spectrum for Compound **2** (DMSO- $d_6$ )

**Figure S26** NOESY spectrum for Compound **2-a** (DMSO- $d_6$ )

**Figure S27** NOESY spectrum for Compound **2-b** (DMSO- $d_6$ )

**Figure S28** NOESY spectrum for Compound **2-c** (DMSO- $d_6$ )

**Figure S29** MS spectrum for of Compound **2**

**Figure S30** UV spectrum for of Compound **2**

**Figure S31**  $^1\text{H}$ -NMR spectrum for Compound **3** (DMSO- $d_6$ )

**Figure S32**  $^{13}\text{C}$ -NMR spectrum for Compound **3** (DMSO- $d_6$ )

**Figure S33** DEPT spectrum for Compound **3** (DMSO- $d_6$ )

**Figure S34** HSQC spectrum for Compound **3** (DMSO- $d_6$ )

**Figure S35** HSQC spectrum for Compound **3-a** (DMSO- $d_6$ )

**Figure S36** HSQC spectrum for Compound **3-b** (DMSO- $d_6$ )

**Figure S37** HMBC spectrum for Compound **3** (DMSO-*d*<sub>6</sub>)

**Figure S38** HMBC spectrum for Compound **3-a** (DMSO-*d*<sub>6</sub>)

**Figure S39** HMBC spectrum for Compound **3-b** (DMSO-*d*<sub>6</sub>)

**Figure S40** NOESY spectrum for Compound **3** (DMSO-*d*<sub>6</sub>)

**Figure S41** MS spectrum for Compound **3**

**Figure S42** UV spectrum for Compound **3**

**Table S1** <sup>1</sup>H and <sup>13</sup>C NMR spectroscopic data for compounds **1** and **3**

| <b>1</b>           |                     |                     |             | <b>3</b>           |                           |                     |               |
|--------------------|---------------------|---------------------|-------------|--------------------|---------------------------|---------------------|---------------|
| Position           | $\delta_{\text{H}}$ | $\delta_{\text{C}}$ | HMBC        | Position           | $\delta_{\text{H}}$       | $\delta_{\text{C}}$ | HMBC          |
| 2                  | 8.39(1,s)           | 149.6               | 3,3a,9      | 1                  |                           | 112.7               |               |
| 3                  |                     | 120.8               |             | 2                  |                           | 144.6               |               |
| 3a                 |                     | 115.5               |             | 3                  |                           | 136.9               |               |
| 4                  |                     | 141.1               |             | 4                  |                           | 145.4               |               |
| 5                  |                     | 144.3               |             | 5                  |                           | 138.6               |               |
| 6                  |                     | 143.6               |             | 6                  |                           | 147.9               |               |
| 7                  |                     | 134.7               |             | 7                  | 2.97(2,t, <i>J</i> =7.1)  | 23.2                | 1,2,6         |
| 7a                 |                     | 143.4               |             | 8                  | 4.35(2, t, <i>J</i> =7.1) | 63.6                | 1,7'          |
| 1'                 |                     | 137.9               |             | 1'                 |                           | 129.9               |               |
| 2'                 | 7.88(1,m)           | 129.3               | 3',4',7'    | 2'                 | 7.93(1,m)                 | 129.1               | 1',3',4', 7'  |
| 3'                 | 7.57(1,m)           | 128.7               | 1',2'       | 3'                 | 7.49(1,m)                 | 128.6               | 2',4'         |
| 4'                 | 7.70(1,m)           | 133.4               | 2',3',5',6' | 4'                 | 7.62(1,m)                 | 133.2               | 2',3',5',6'   |
| 5'                 | 7.57(1,m)           | 128.7               | 1', 6'      | 5'                 | 7.49(1,m)                 | 128.6               | 4',6'         |
| 6'                 | 7.88(1,m)           | 129.3               | 4',5',7'    | 6'                 | 7.93(1,m)                 | 129.1               | 1', 4', 5',7' |
| 7'                 |                     | 188.8               |             | 7'                 |                           | 165.9               |               |
| 4-OCH <sub>3</sub> | 3.59(3, s)          | 60.7                | 4           | 3-OCH <sub>3</sub> | 3.69(3, s)                | 60.8                | 3             |
| 5-OCH <sub>3</sub> | 3.79(3, s)          | 61.2                | 5           | 4-OCH <sub>3</sub> | 3.82(3, s)                | 60.8                | 4             |
| 6-OCH <sub>3</sub> | 3.89(3, s)          | 61.5                | 6           | 5-OCH <sub>3</sub> | 3.71(3, s)                | 60.8                | 5             |
| 7-OCH <sub>3</sub> | 4.03(3, s)          | 61.1                | 7           | 6-OCH <sub>3</sub> | 3.74(3, s)                | 60.9                | 6             |
|                    |                     |                     |             | 2-OH               | 8.83(1, s)                |                     |               |

Values in ppm ( $\delta$ )

<sup>1</sup>H NMR (400 MHz, in DMSO-*d*<sub>6</sub>), <sup>13</sup>C NMR (100 MHz, in DMSO-*d*<sub>6</sub>)

**Table S2**  $^1\text{H}$  and  $^{13}\text{C}$  NMR spectroscopic data for compounds **2**

| Position           | <b>2</b>                       |                     |            |
|--------------------|--------------------------------|---------------------|------------|
|                    | $\delta_{\text{H}}$            | $\delta_{\text{C}}$ | HMBC       |
| 1                  |                                | 117.9               |            |
| 2                  |                                | 143.3               |            |
| 3                  |                                | 137.2               |            |
| 4                  |                                | 142.7               |            |
| 5                  |                                | 137.9               |            |
| 6                  |                                | 146.9               |            |
| 7                  | 2.84(2H, m)                    | 19.4                | 8,1',2',6' |
| 8                  | 3.02(2H, m)                    | 39.6                |            |
| 9                  |                                | 200.2               |            |
| 1'                 |                                | 136.3               |            |
| 2'                 | 8.03(1H, m)                    | 128.0               | 3',4',9    |
| 3'                 | 7.52(1H, m)                    | 128.5               | 1',2',4'   |
| 4'                 | 7.63(1H, m)                    | 132.9               | 3',5'      |
| 5'                 | 7.52(1H, m)                    | 128.5               | 1',4',6'   |
| 6'                 | 8.03(1H, m)                    | 128.0               | 4',5',9    |
| 1''                | 4.93(1H, d, $J=7.36$ )         | 102.8               | 2          |
| 2''                | 3.18(1H, m)                    | 73.9                |            |
| 3''                | 3.20(1H, m)                    | 76.3                |            |
| 4''                | 3.06(1H, m)                    | 70.0                |            |
| 5''                | 3.07(1H, m)                    | 77.2                |            |
| 6''                | 3.62(2H, dd, $J=11.56, 3.92$ ) | 60.9                |            |
| 3-OCH <sub>3</sub> | 3.70(3H, s)                    | 60.1                | 3          |
| 5-OCH <sub>3</sub> | 3.72(3H, s)                    | 60.5                | 5          |
| 6-OCH <sub>3</sub> | 3.73(3H, s)                    | 60.6                | 6          |
| 4-OH               | 8.88(1H, s)                    |                     |            |

Values in ppm ( $\delta$ ) $^1\text{H}$  NMR (400 MHz, in DMSO- $d_6$ ),  $^{13}\text{C}$  NMR (100 MHz, in DMSO- $d_6$ )

**Table S3**  $^1\text{H}$  and  $^{13}\text{C}$  NMR spectroscopic data for compounds **4** and **5**

| Position           | <b>4</b>                |                     | Position            | <b>5</b>                |                     |
|--------------------|-------------------------|---------------------|---------------------|-------------------------|---------------------|
|                    | $\delta_{\text{H}}$     | $\delta_{\text{C}}$ |                     | $\delta_{\text{H}}$     | $\delta_{\text{C}}$ |
| 1                  |                         | 116.2               | 1                   |                         | 106.1               |
| 2                  |                         | 144.1               | 2                   | 7.30(1H, m)             | 128.3               |
| 3                  |                         | 136.4               | 3                   | 7.23(1H, m)             | 128.3               |
| 4                  |                         | 138.7               | 4                   | 7.18(1H, m)             | 125.9               |
| 5                  |                         | 145.0               | 5                   | 7.23(1H, m)             | 128.3               |
| 6                  |                         | 147.3               | 6                   | 7.30(1H, m)             | 128.3               |
| 7                  | 2.82(2H, t, $J=8.0$ Hz) | 19.1                | 7                   | 2.89(2H, t, $J=7.6$ Hz) | 30.0                |
| 8                  | 3.12(2H, t, $J=8.0$ Hz) | 38.4                | 8                   | 3.25(2H, t, $J=7.6$ Hz) | 45.4                |
| 9                  |                         | 199.7               | 9                   |                         | 204.6               |
| 1'                 |                         | 137.1               | 1'                  |                         | 141.3               |
| 2'                 | 7.98(1H, m)             | 127.9               | 2'                  |                         | 156.6               |
| 3'                 | 7.52(1H, m)             | 128.7               | 3'                  |                         | 129.7               |
| 4'                 | 7.63(1H, m)             | 133.1               | 4'                  |                         | 158.1               |
| 5'                 | 7.52(1H, m)             | 128.7               | 5'                  | 6.27(1H, s)             | 88.0                |
| 6'                 | 7.98(1H, m)             | 127.9               | 6'                  |                         | 158.1               |
| 3-OCH <sub>3</sub> | 3.70(3H, s)             | 60.8                | 3'-OCH <sub>3</sub> | 3.61(3H, s)             | 59.9                |
| 4-OCH <sub>3</sub> | 3.73(3H, s)             | 60.9                | 4'-OCH <sub>3</sub> | 3.88(3H, s)             | 56.2                |
| 5-OCH <sub>3</sub> | 3.81(3H, s)             | 60.8                | 6'-OCH <sub>3</sub> | 3.90(3H, s)             | 56.0                |
| 6-OCH <sub>3</sub> | 3.73(3H, s)             | 60.8                | 2'-OH               | 13.14(1H, s)            |                     |
| 2-OH               | 8.73(1H, s)             |                     |                     |                         |                     |

Values in ppm ( $\delta$ ) $^1\text{H}$  NMR (400 MHz, in DMSO- $d_6$ ),  $^{13}\text{C}$  NMR (100 MHz, in DMSO- $d_6$ )

**Table S4**  $^1\text{H}$  and  $^{13}\text{C}$  NMR spectroscopic data for compounds **6**, **7** and **8**

| <b>6</b>           |                     |                     | <b>7</b>           |                     |                     | <b>8</b>           |                     |                     |
|--------------------|---------------------|---------------------|--------------------|---------------------|---------------------|--------------------|---------------------|---------------------|
| Position           | $\delta_{\text{H}}$ | $\delta_{\text{C}}$ | Position           | $\delta_{\text{H}}$ | $\delta_{\text{C}}$ | Position           | $\delta_{\text{H}}$ | $\delta_{\text{C}}$ |
| 2                  |                     | 160.0               | 2                  |                     | 163.6               | 2                  |                     | 159.4               |
| 3                  | 6.87(1H, s)         | 107.3               | 3                  | 7.09(1H, s)         | 104.9               | 3                  | 6.79(1H, s)         | 108.0               |
| 4                  |                     | 175.7               | 4                  |                     | 182.8               | 4                  |                     | 175.9               |
| 5                  |                     | 147.0               | 5                  |                     | 145.4               | 5                  |                     | 151.1               |
| 6                  |                     | 143.4               | 6                  |                     | 135.9               | 6                  | 6.70(1H, s)         | 93.7                |
| 7                  |                     | 150.9               | 7                  |                     | 152.7               | 7                  |                     | 156.5               |
| 8                  |                     | 137.5               | 8                  |                     | 132.7               | 8                  |                     | 129.9               |
| 9                  |                     | 147.3               | 9                  |                     | 148.5               | 9                  |                     | 155.7               |
| 10                 |                     | 114.1               | 10                 |                     | 106.4               | 10                 |                     | 107.8               |
| 1'                 |                     | 131.4               | 1'                 |                     | 130.7               | 1'                 |                     | 131.0               |
| 2'                 | 8.05(1H, m)         | 125.7               | 2'                 | 8.09(1H, m)         | 126.4               | 2'                 | 8.03(1H, m)         | 125.8               |
| 3'                 | 7.60(1H, m)         | 129.0               | 3'                 | 7.62(1H, m)         | 128.7               | 3'                 | 7.58(1H, m)         | 129.2               |
| 4'                 | 7.60 (1H, m)        | 130.7               | 4'                 | 7.62(1H, m)         | 132.3               | 4'                 | 7.58(1H, m)         | 131.5               |
| 5'                 | 7.60 (1H, m)        | 129.0               | 5'                 | 7.62(1H, m)         | 128.7               | 5'                 | 7.58(1H, m)         | 129.2               |
| 6'                 | 8.05 (1H, m)        | 125.7               | 6'                 | 8.09(1H, m)         | 126.4               | 6'                 | 8.03(1H, m)         | 125.8               |
| 5-OCH <sub>3</sub> | 3.70(3H, s)         | 62.8                | 6-OCH <sub>3</sub> | 3.83(3H, s)         | 60.6                | 5-OCH <sub>3</sub> | 3.99(3H, s)         | 56.3                |
| 6-OCH <sub>3</sub> | 3.73(3H, s)         | 61.7                | 7-OCH <sub>3</sub> | 4.94(3H, s)         | 62.0                | 7-OCH <sub>3</sub> | 3.89(3H, s)         | 56.4                |
| 7-OCH <sub>3</sub> | 3.81(3H, s)         | 61.3                | 8-OCH <sub>3</sub> | 4.04(3H, s)         | 61.5                | 8-OCH <sub>3</sub> | 3.85(3H, s)         | 61.0                |
| 8-OCH <sub>3</sub> | 3.73(3H, s)         | 61.2                | 5-OH               | 12.62(1H, s)        |                     |                    |                     |                     |

Values in ppm ( $\delta$ ) $^1\text{H}$  NMR (400 MHz, in DMSO- $d_6$ ),  $^{13}\text{C}$  NMR (100 MHz, in DMSO- $d_6$ )

**Table S5** The cell survival rate under the influence of tested fractions (n=3)

| Concentration        | total extract   | petroleum ether | dichloromethane | ethyl acetate   | N-butanol       |
|----------------------|-----------------|-----------------|-----------------|-----------------|-----------------|
| ( $\mu\text{g/mL}$ ) | (100%)          | fraction (100%) | fraction (100%) | fraction (100%) | fraction (100%) |
| 0                    | $100 \pm 1.1$   |
| 40                   | $105.5 \pm 2.1$ | $96.5 \pm 8.5$  | $102.2 \pm 1.2$ | $100.1 \pm 1.5$ | $107.7 \pm 6.1$ |
| 60                   | $102.0 \pm 1.5$ | $92.9 \pm 3.7$  | $99.8 \pm 2.1$  | $98.1 \pm 4.2$  | $105.5 \pm 4.2$ |
| 80                   | $68.0 \pm 8.0$  | $87.1 \pm 6.8$  | $96.8 \pm 4.1$  | $100.3 \pm 2.4$ | $79.4 \pm 17.7$ |
| 100                  | $59.7 \pm 13.4$ | $76.8 \pm 9.5$  | $95.5 \pm 6.6$  | $98.1 \pm 3.4$  | $69.7 \pm 21.3$ |
| 160                  | $51.3 \pm 11.3$ | $63.8 \pm 7.8$  | $61.9 \pm 2.7$  | $91.0 \pm 4.5$  | $50.5 \pm 13.7$ |

**Table S6** Inhibitory activity against TNF- $\alpha$  of tested fractions and compounds (n=3)

| Samples                                         | Inhibition rate (%) |
|-------------------------------------------------|---------------------|
| total extract (40 $\mu\text{g/mL}$ )            | 16.2                |
| total extract (60 $\mu\text{g/mL}$ )            | 27.7                |
| petroleum ether fraction (40 $\mu\text{g/mL}$ ) | 2.5                 |
| petroleum ether fraction (60 $\mu\text{g/mL}$ ) | 2.4                 |
| dichloromethane fraction (40 $\mu\text{g/mL}$ ) | 33.5                |
| dichloromethane fraction (60 $\mu\text{g/mL}$ ) | 38.2                |
| ethyl acetate fraction (80 $\mu\text{g/mL}$ )   | 16.1                |
| ethyl acetate fraction (100 $\mu\text{g/mL}$ )  | 25.4                |
| N-butanol fraction (40 $\mu\text{g/mL}$ )       | 14.1                |
| N-butanol fraction (60 $\mu\text{g/mL}$ )       | 23.2                |
| Compound 1(10 $\mu\text{M}$ )                   | 70.2                |
| Compound 2(10 $\mu\text{M}$ )                   | 20.7                |
| Compound 3(10 $\mu\text{M}$ )                   | 65.2                |
| Compound 4(10 $\mu\text{M}$ )                   | 42.2                |
| Compound 5(10 $\mu\text{M}$ )                   | 21.3                |
| Compound 6(10 $\mu\text{M}$ )                   | 19.0                |
| Compound 7(10 $\mu\text{M}$ )                   | 17.9                |
| Compound 8(10 $\mu\text{M}$ )                   | 18.0                |

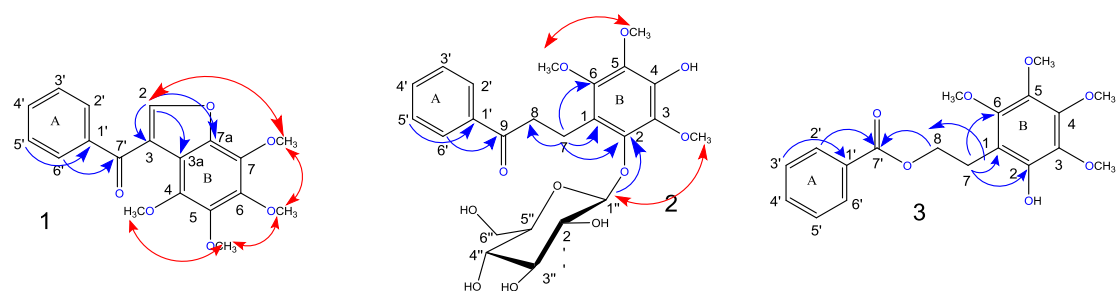

Figure S1. Key HMBC ( → ) and NOESY ( → ) data for compounds 1-3

**Figure S1** Key HMBC and NOESY correlations of compounds **1-3**

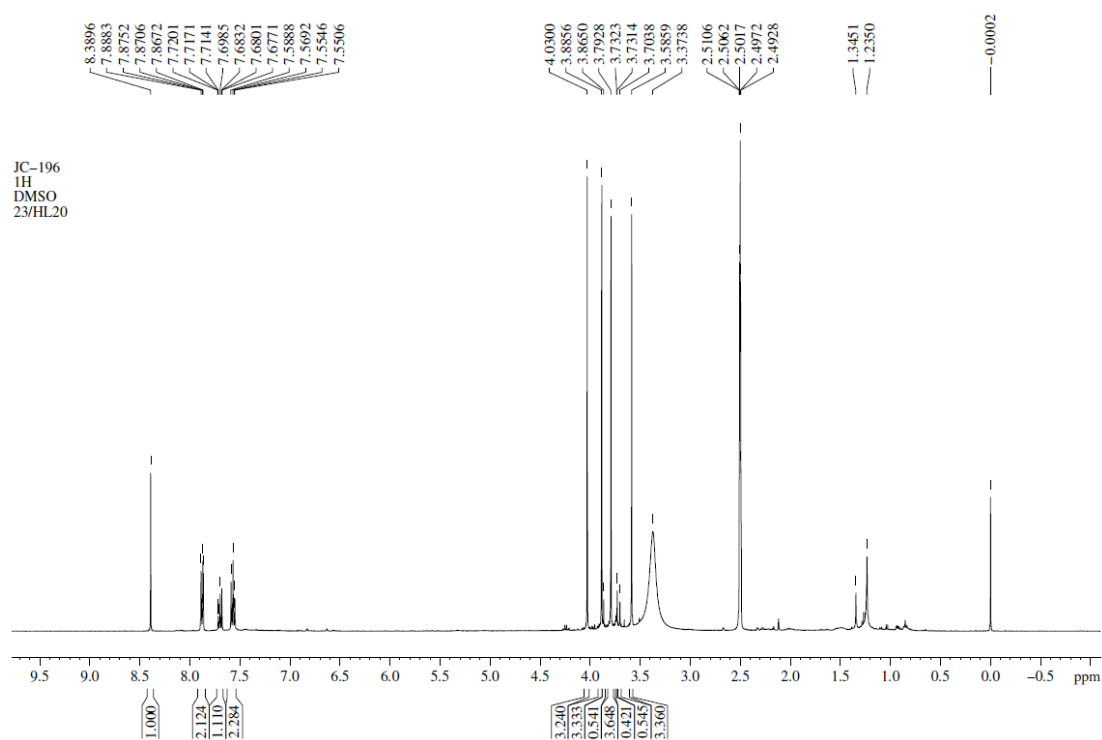

**Figure S2**  $^1\text{H}$ -NMR spectrum for Compound **1**



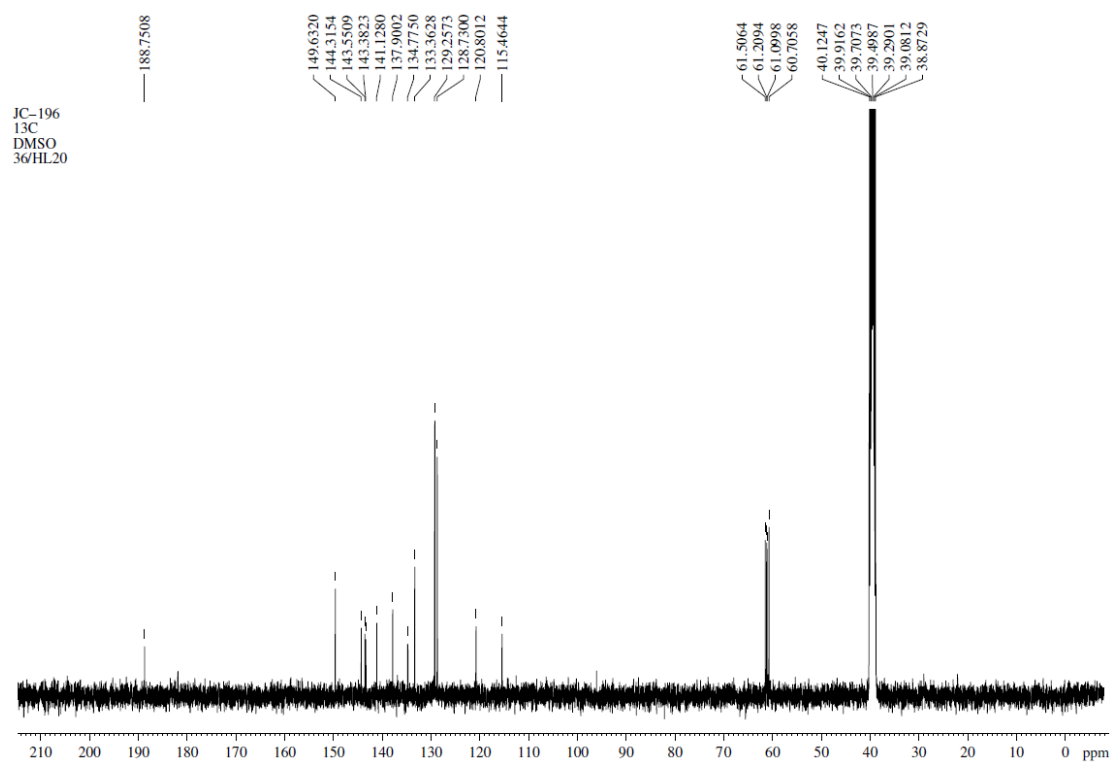

**Figure S3** <sup>13</sup>C-NMR spectrum for Compound 1

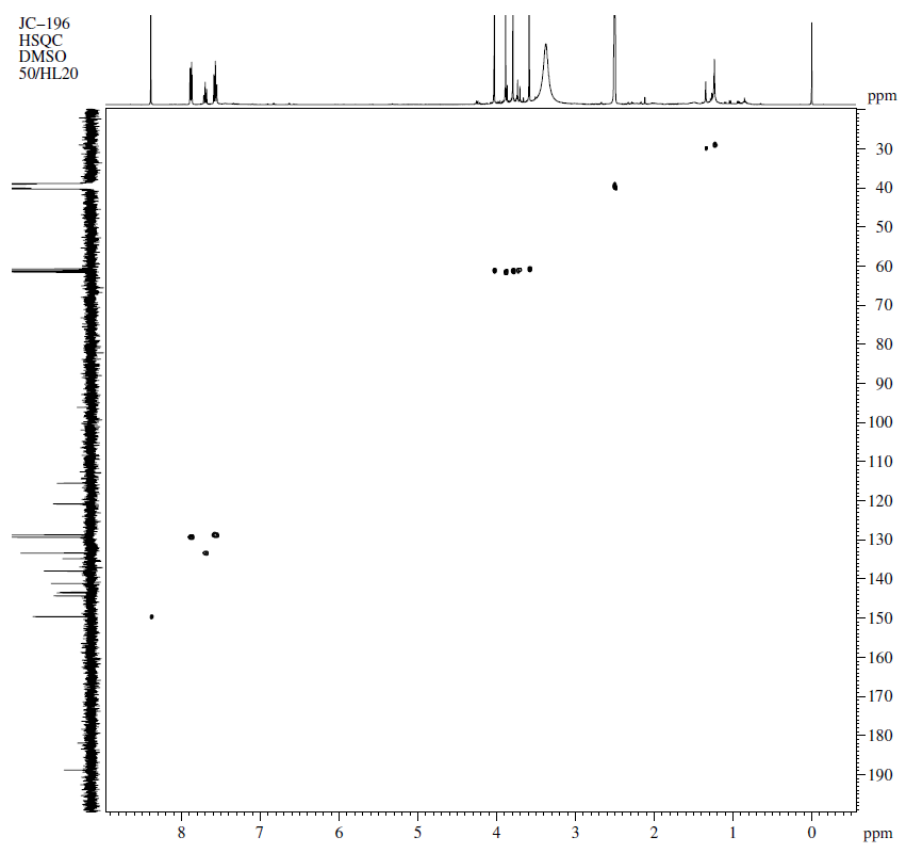

**Figure S4** HSQC spectrum for Compound 1

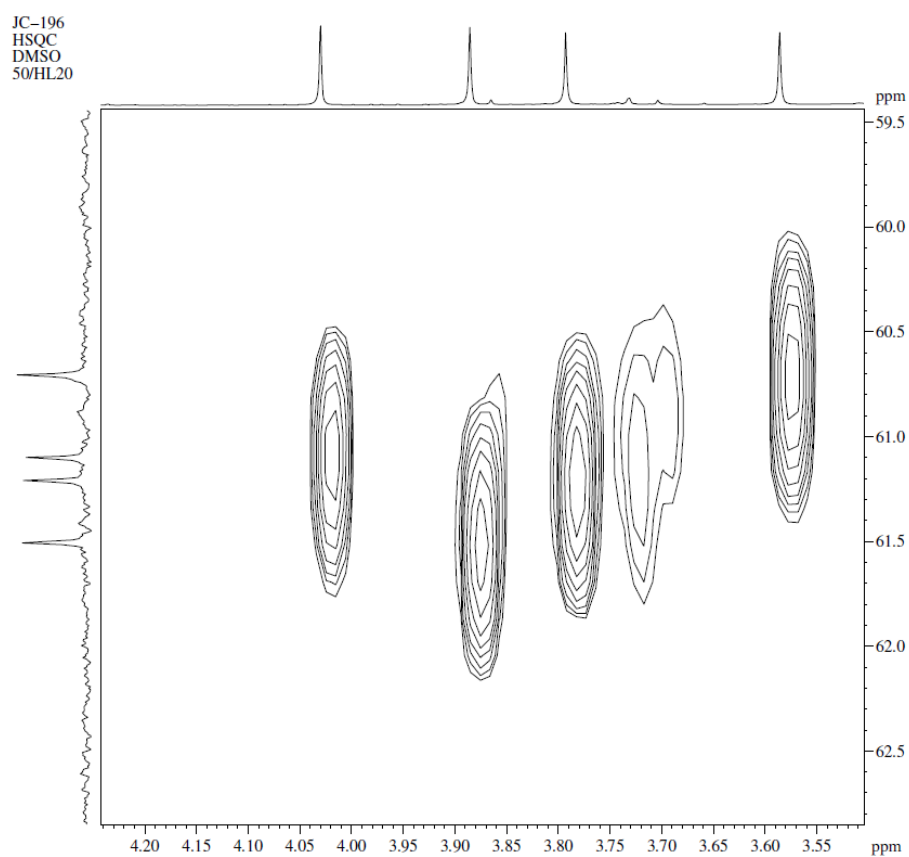

**Figure S5** HSQC spectrum for Compound 1-a

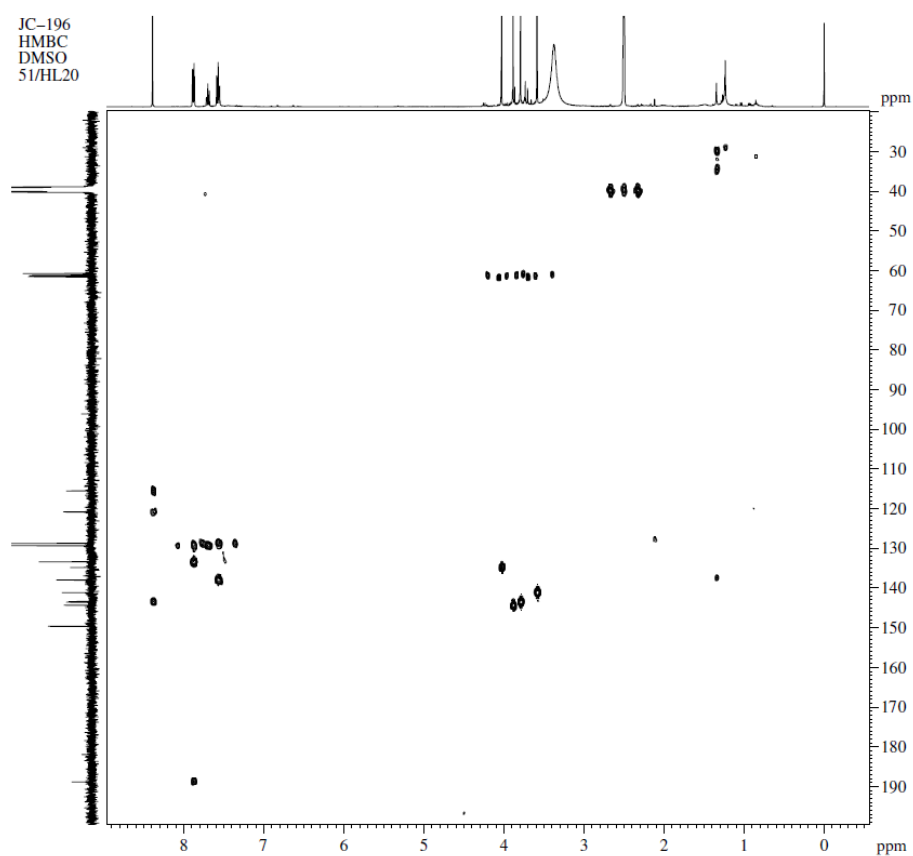

**Figure S6** HMBC spectrum for Compound 1

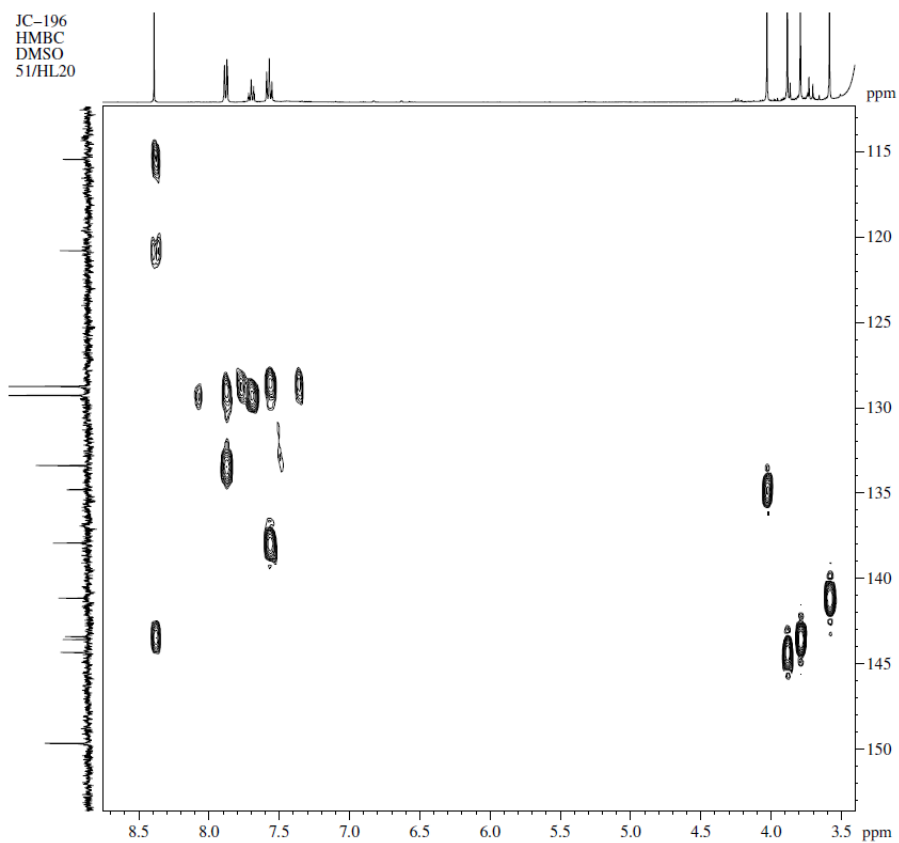

**Figure S7** HMBC spectrum for Compound **1-a**

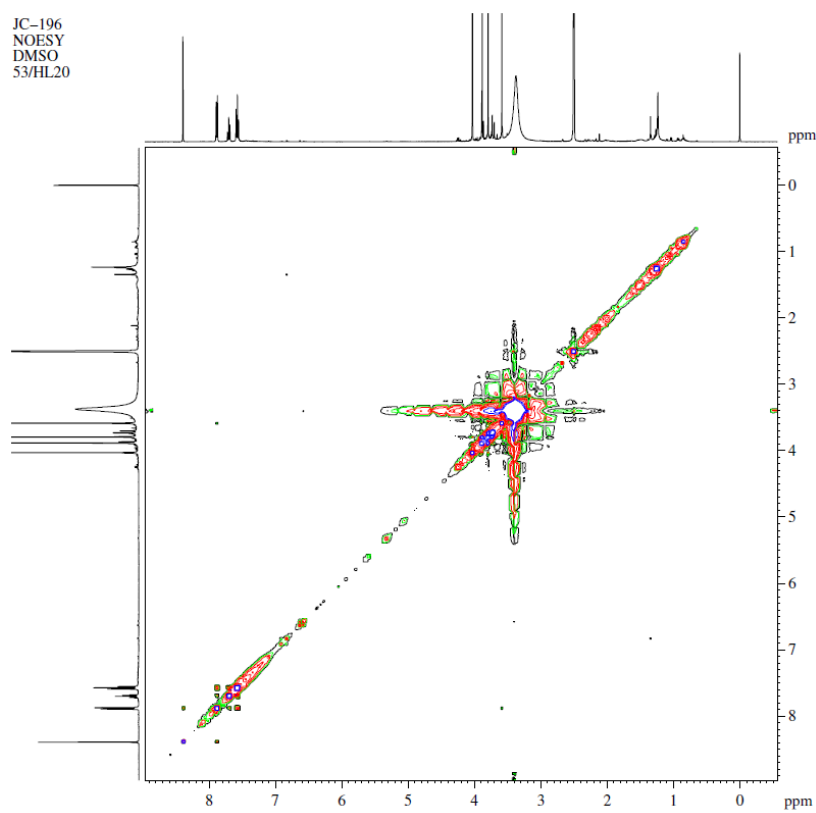

**Figure S8** NOESY spectrum for Compound **1**

JC-196  
NOESY  
DMSO  
53/HL20

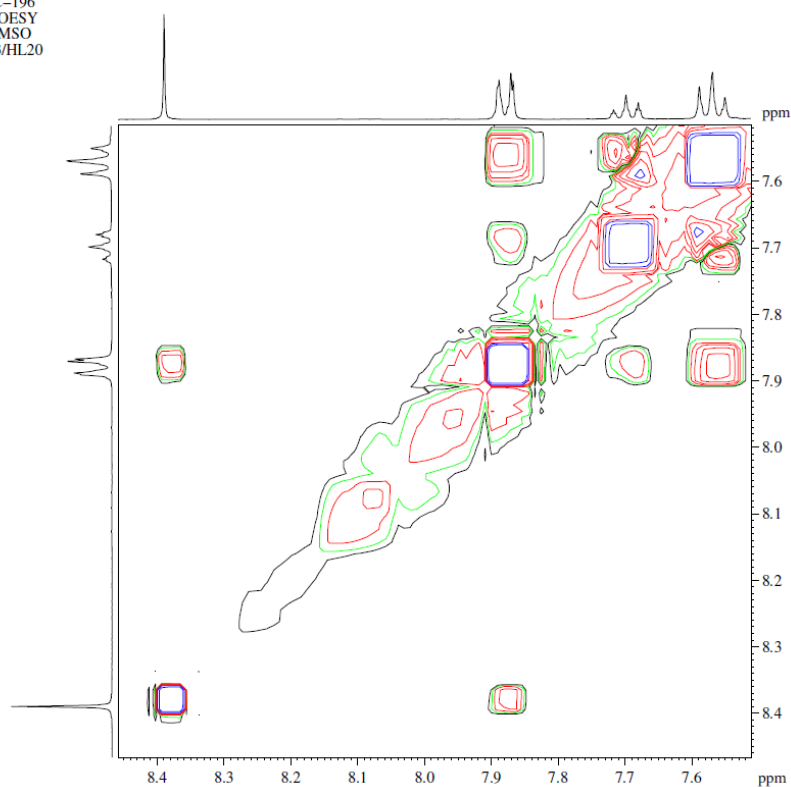

**Figure S9** NOESY spectrum for Compound **1-a**

JC-196  
NOESY  
DMSO  
53/HL20

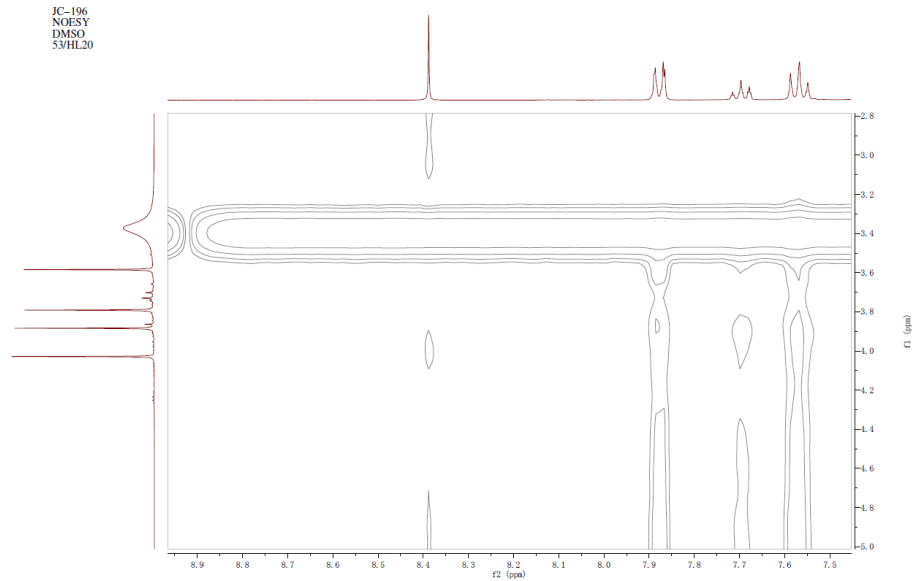

**Figure S10** NOESY spectrum for Compound **1-b**

JC-196  
NOESY  
DMSO  
53/HL20

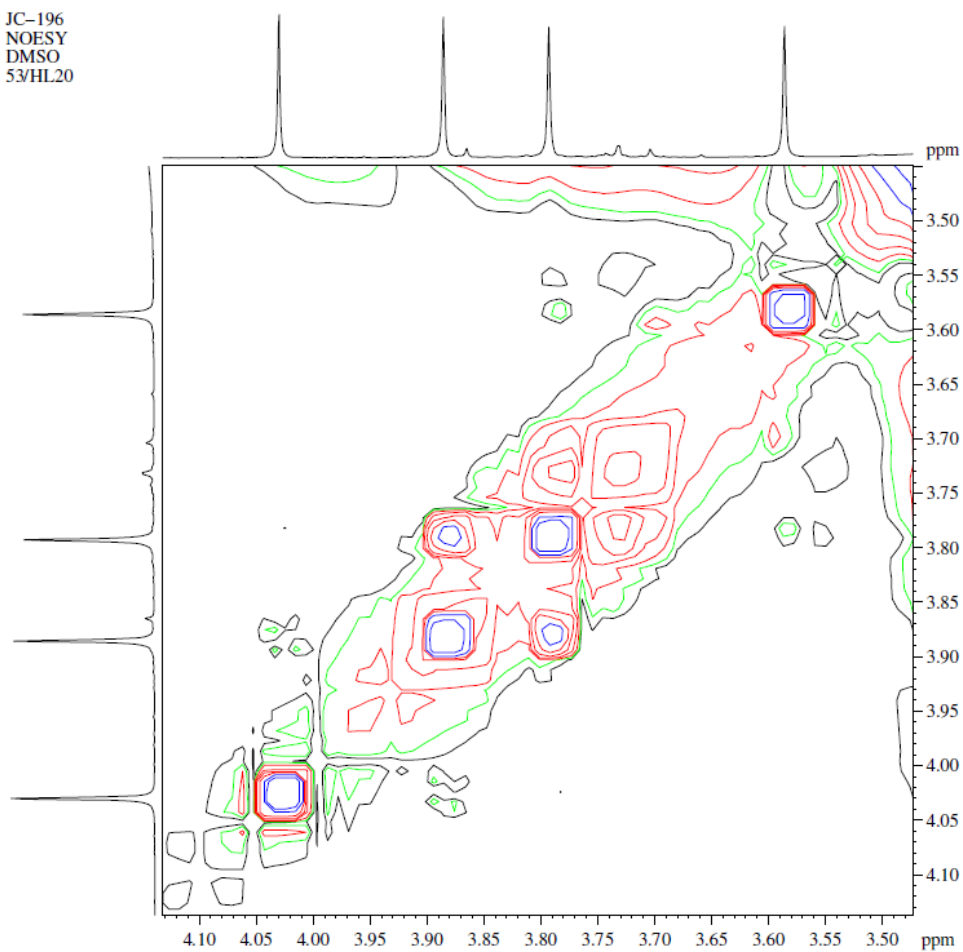

**Figure S11** NOESY spectrum for Compound 1-c

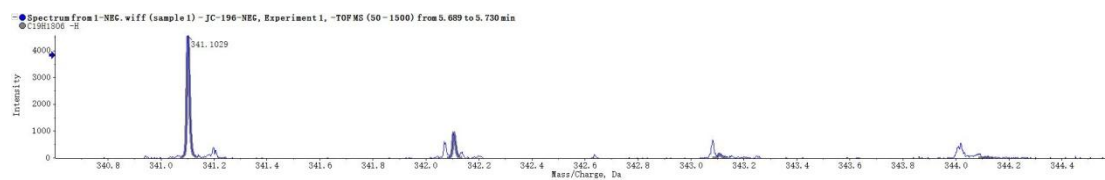

**Figure S12** MS spectrum for Compound 1

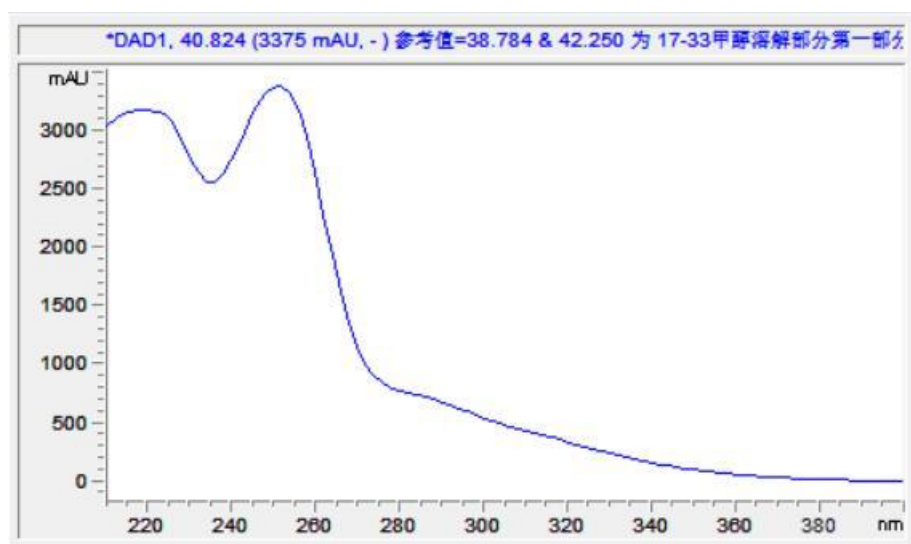

**Figure S13** UV spectrum for Compound 1

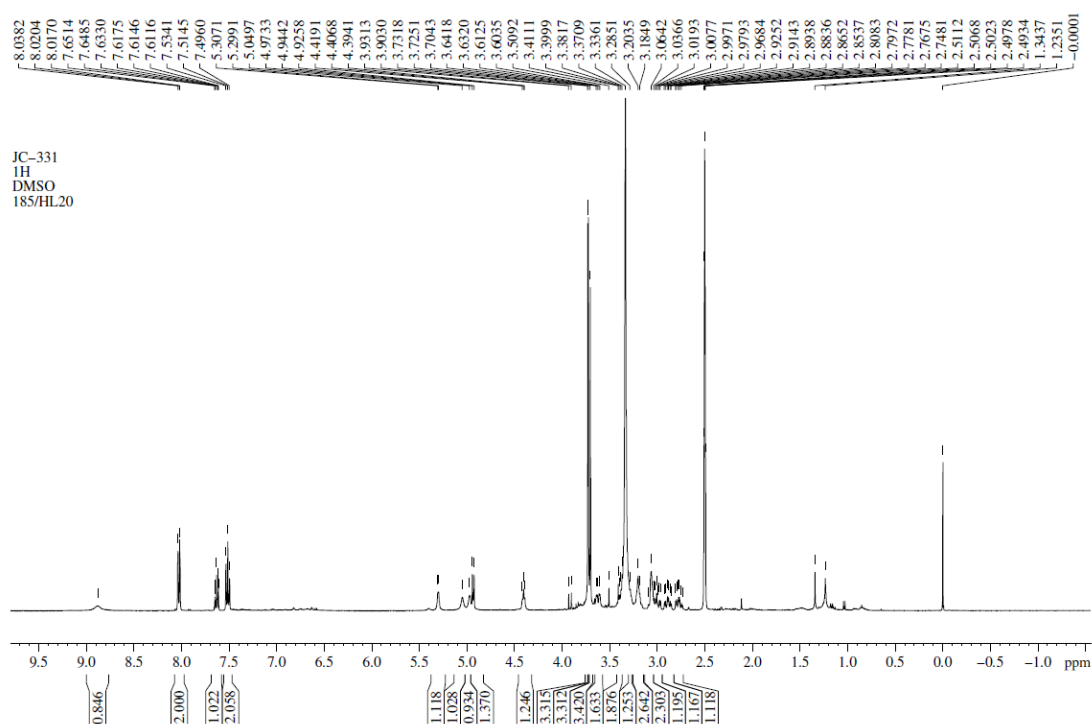

**Figure S14**  $^1\text{H}$ -NMR spectrum for Compound 2

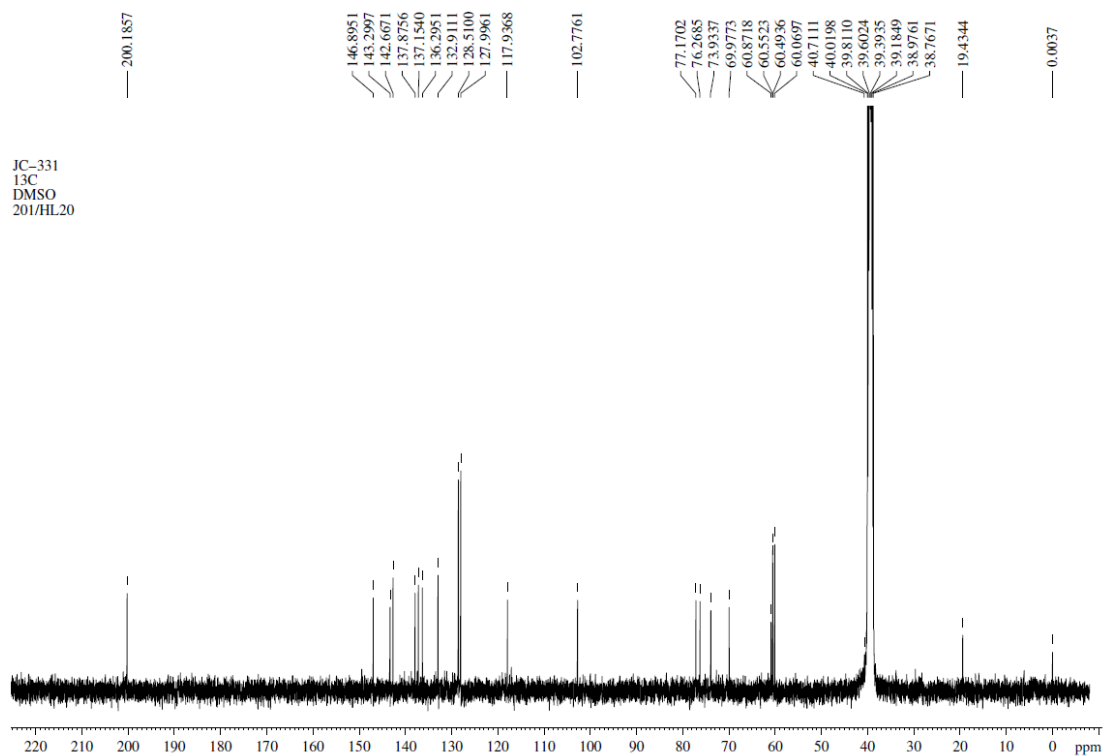

**Figure S15**  $^{13}\text{C}$ -NMR spectrum for Compound **2**

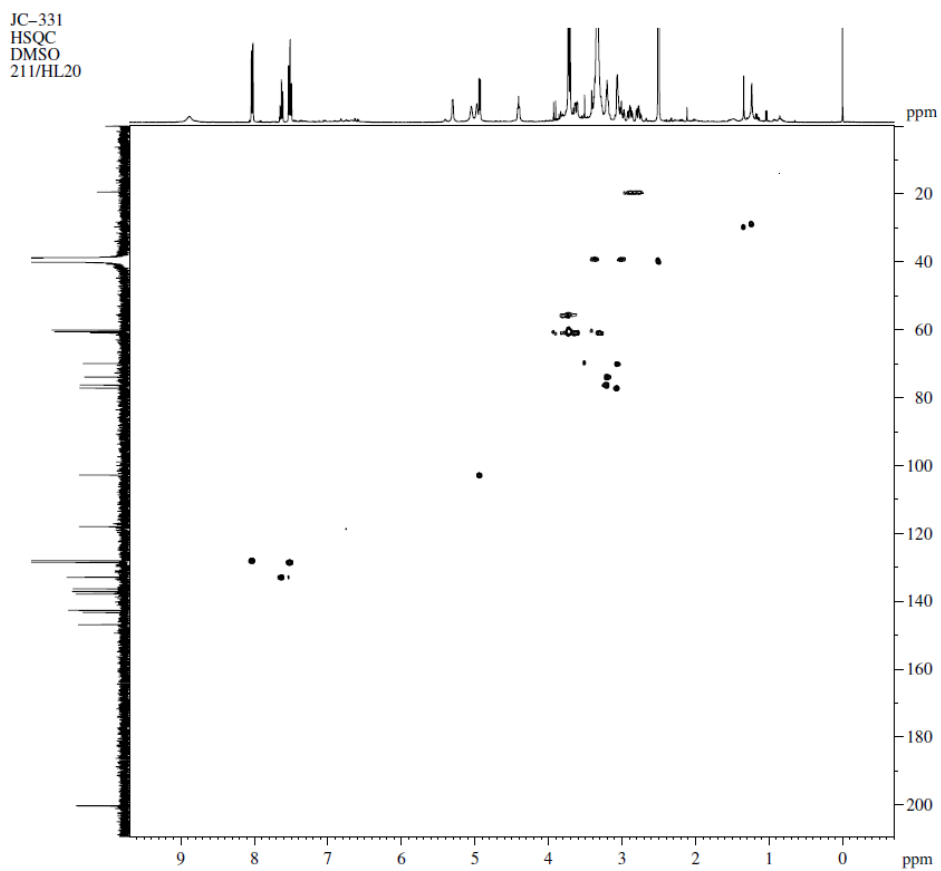

**Figure S16** HSQC spectrum for Compound **2**

JC-331  
HSQC  
DMSO  
211/HL20

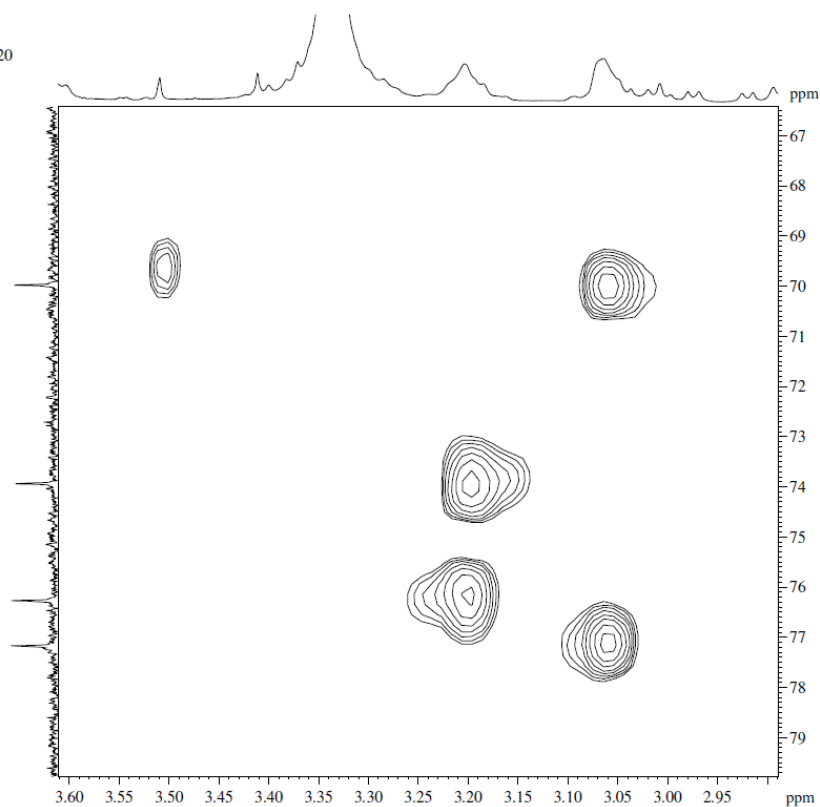

**Figure S17** HSQC spectrum for Compound **2-a**

JC-331  
HSQC  
DMSO  
211/HL20

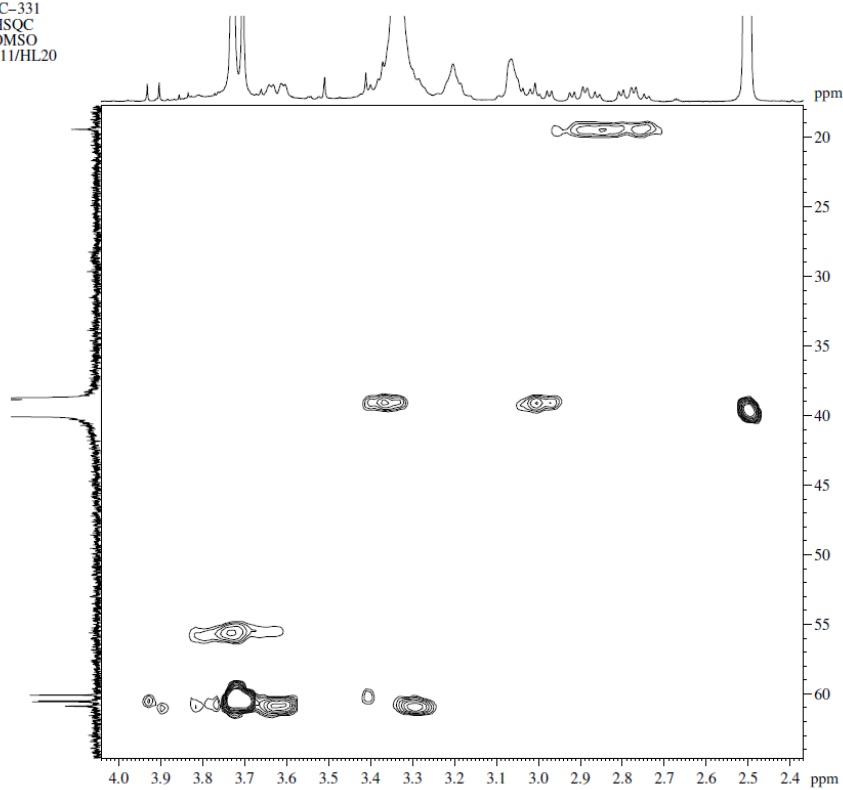

**Figure S18** HSQC spectrum for Compound **2-b**



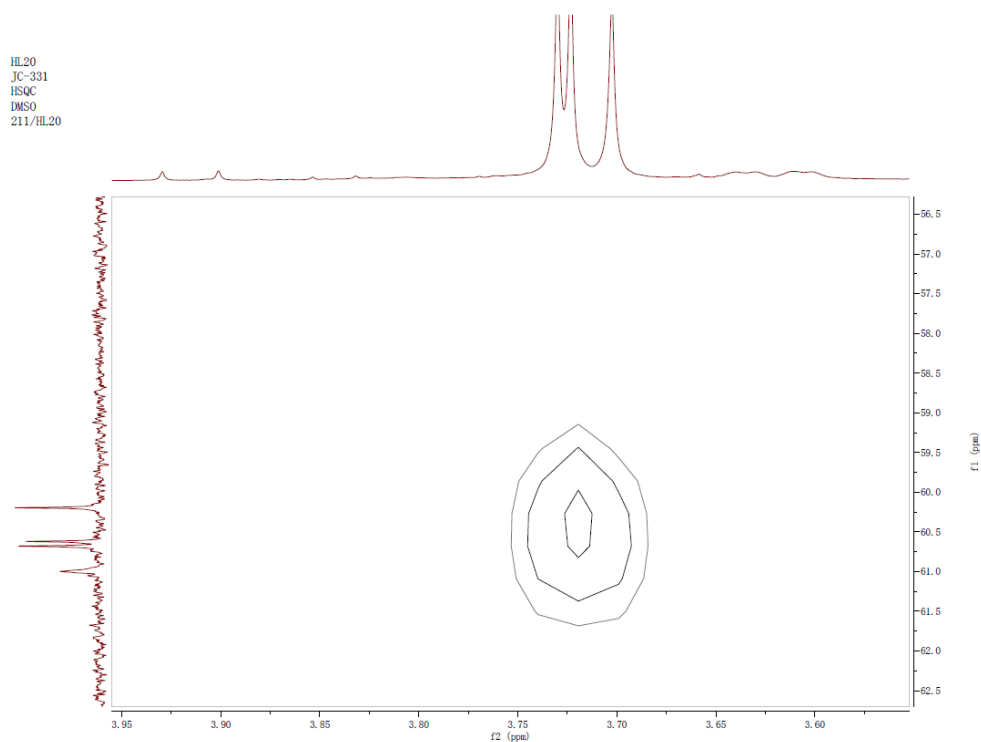

**Figure S19** HSQC spectrum for Compound 2-c

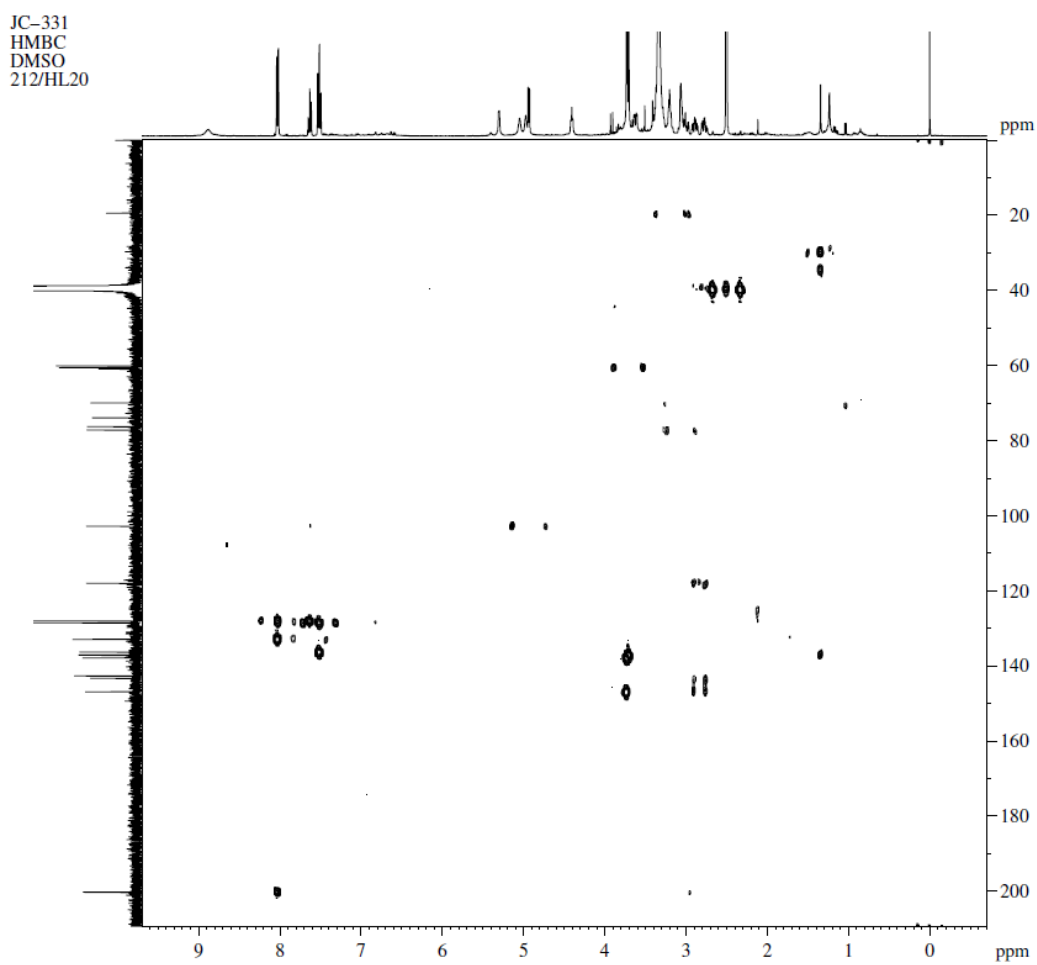

**Figure S20** HMBC spectrum for Compound 2

HL20  
JC-331  
HMBC  
DMSO  
212/HL20

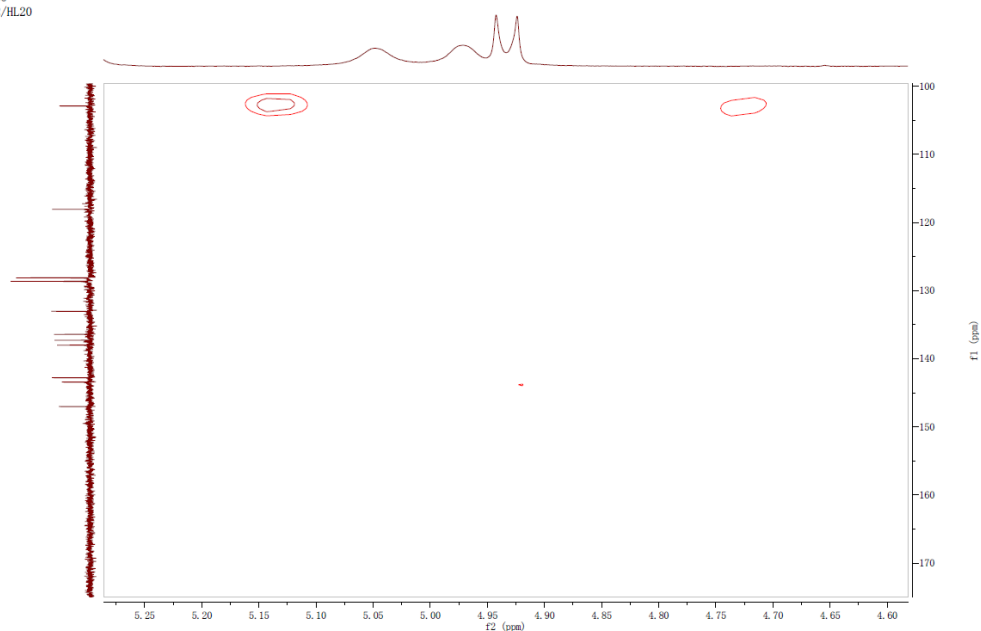

**Figure S21** HMBC spectrum for Compound 2-a

HL20  
JC-331  
HMBC  
DMSO  
212/HL20

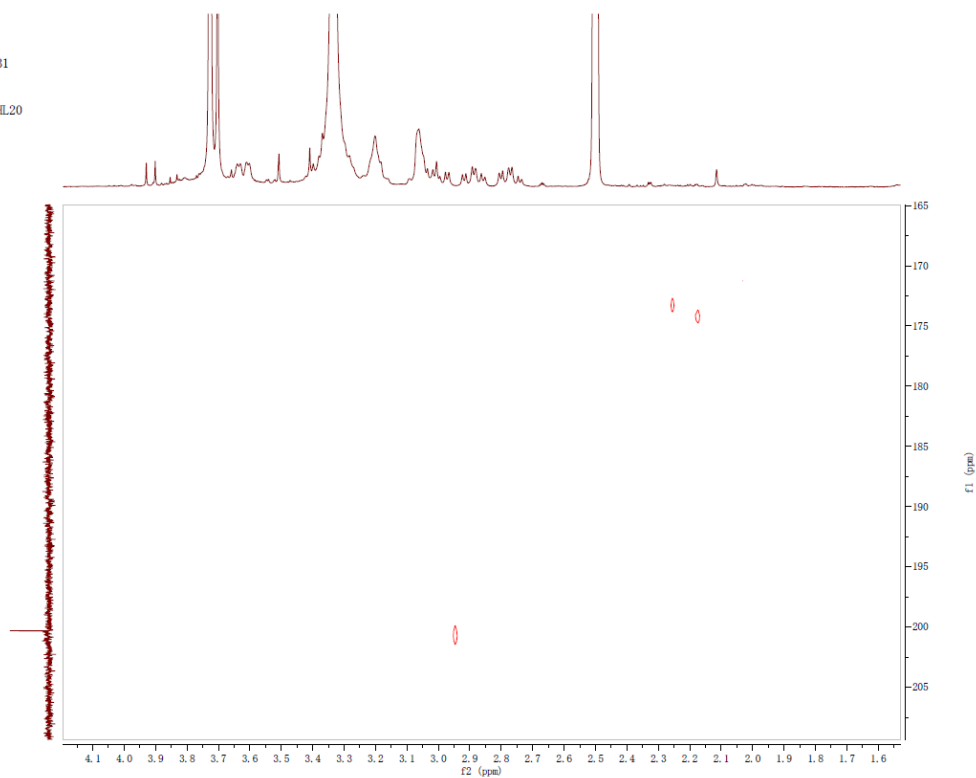

**Figure S22** HMBC spectrum for Compound 2-b

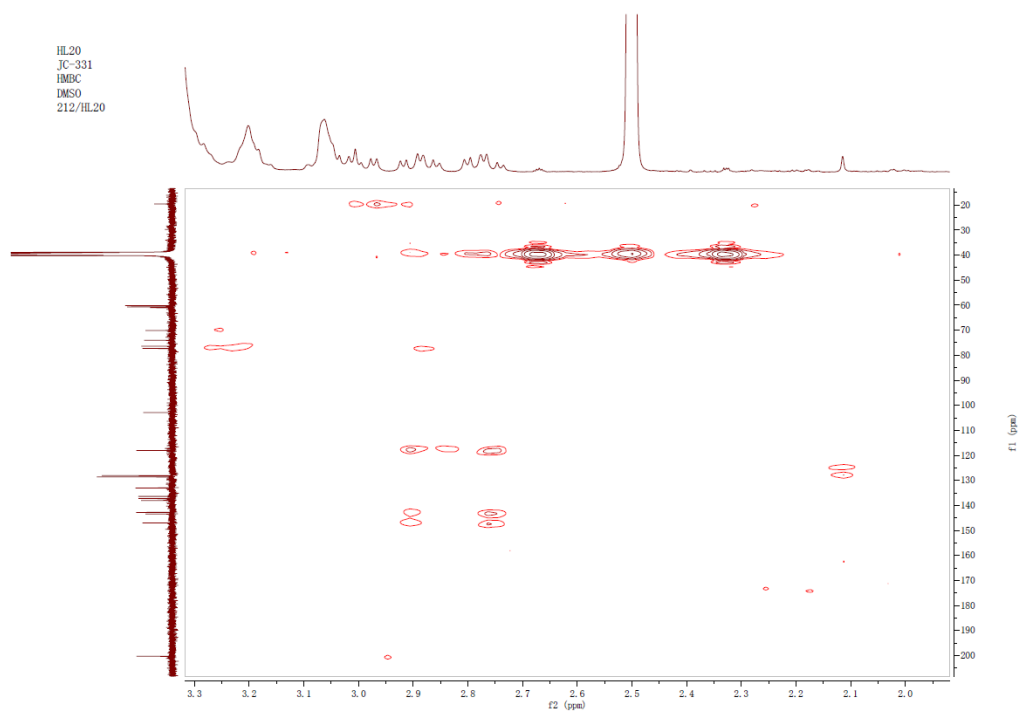

**Figure S23** HMBC spectrum for Compound 2-c

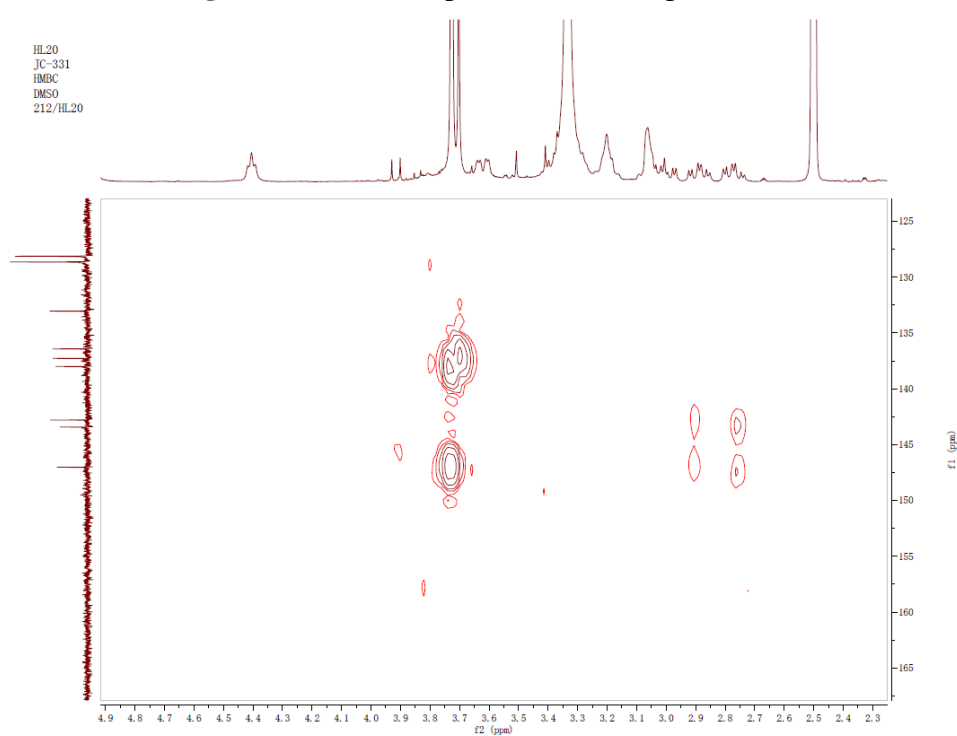

**Figure S24** HMBC spectrum for Compound 2-d

JC-331  
NOESY  
DMSO  
253/HL20

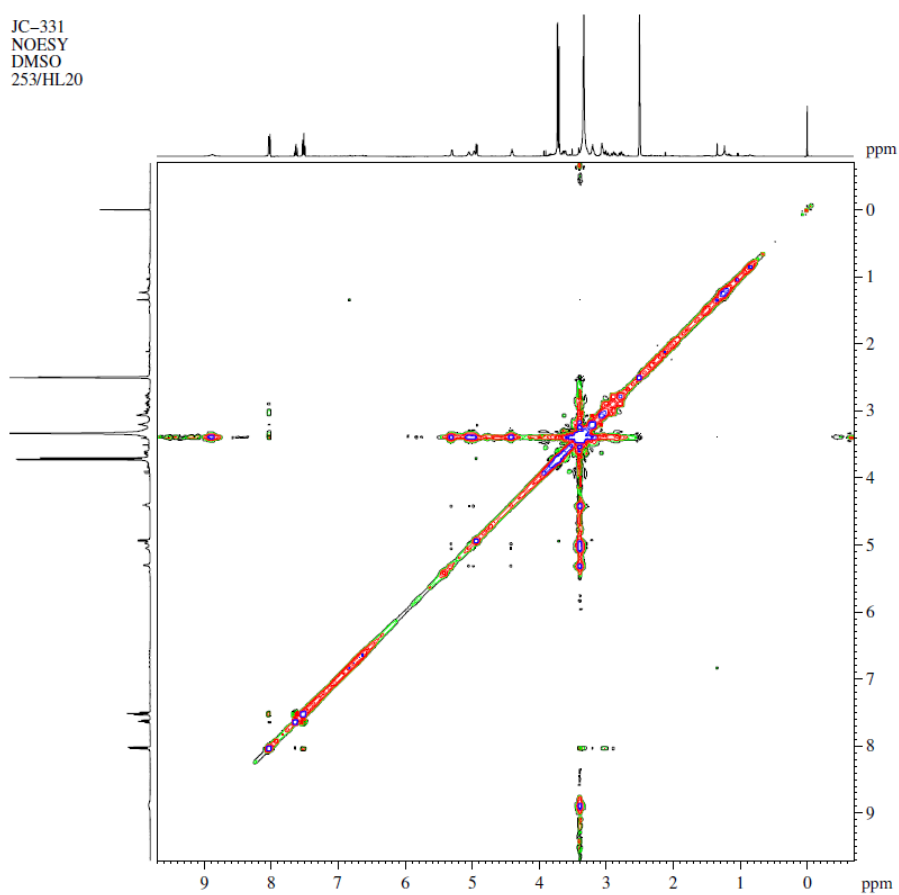

**Figure S25** NOESY spectrum for Compound **2**

JC-331  
NOESY  
DMSO  
253/HL20

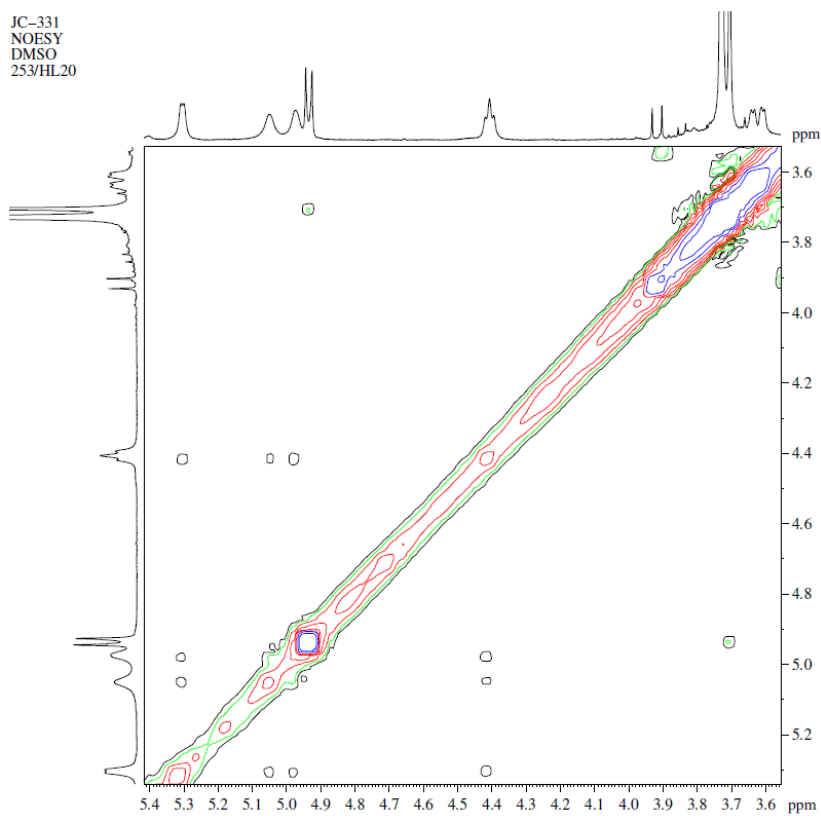

**Figure S26** NOESY spectrum for Compound **2-a**

JC-331  
NOESY  
DMSO  
253/HL20

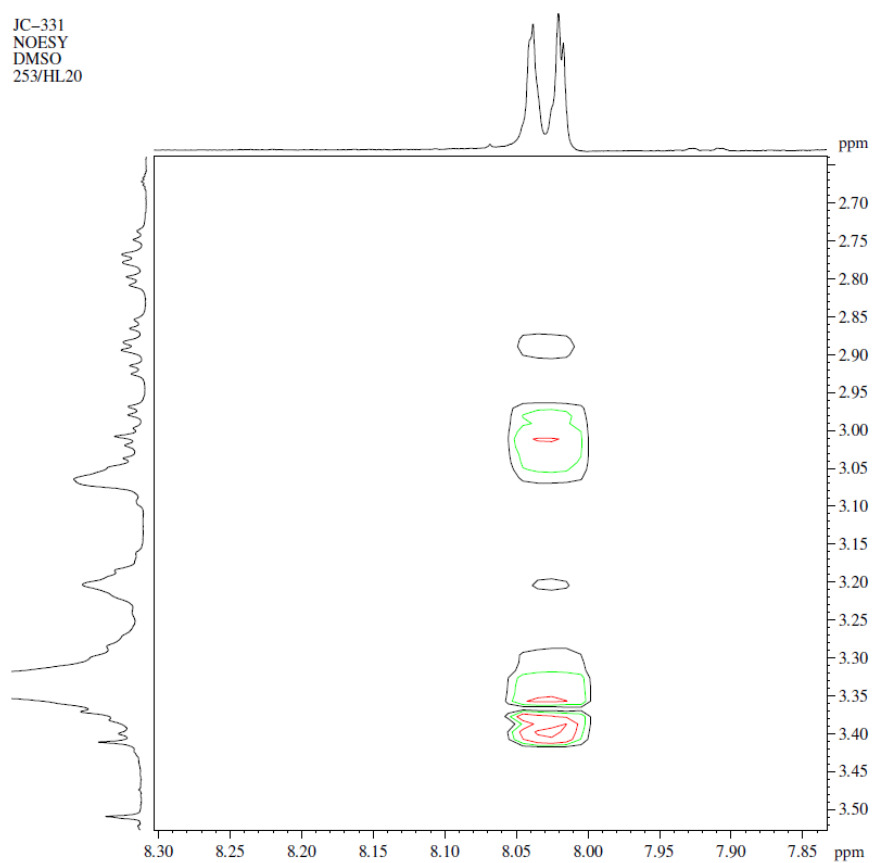

**Figure S27** NOESY spectrum for Compound 2-b

HL20  
JC-331  
NOESY  
DMSO  
253/HL20

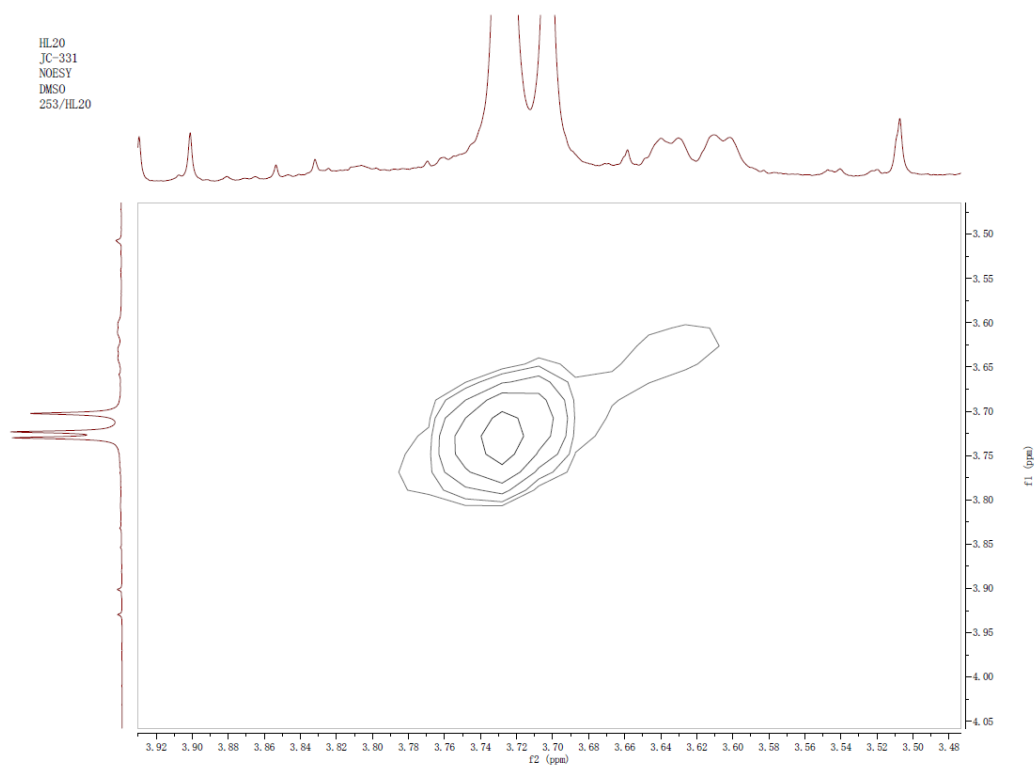

**Figure S28** NOESY spectrum for Compound 2-c

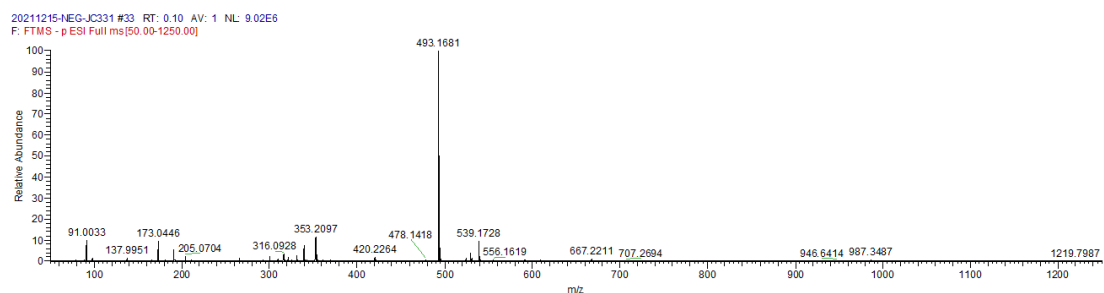

**Figure S29** MS spectrum for of Compound **2**

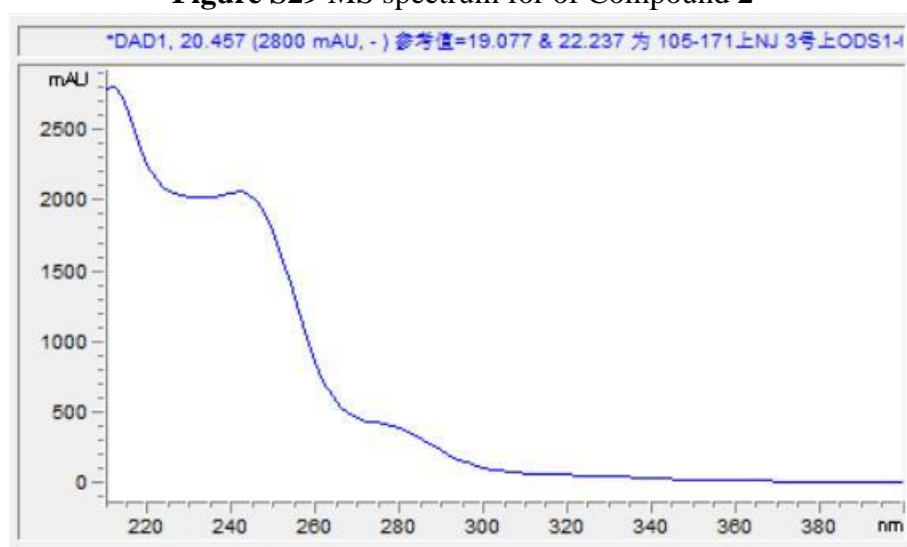

**Figure S30** UV spectrum for of Compound **2**

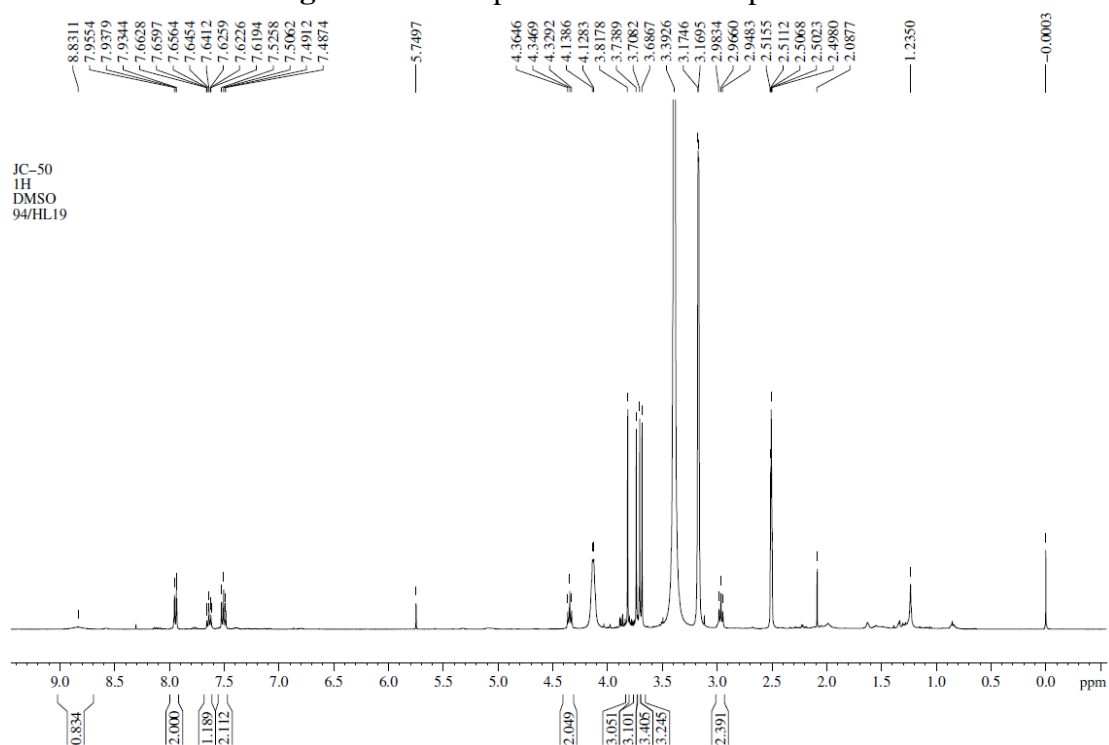

**Figure S31**  $^1\text{H}$ -NMR spectrum for Compound **3** ( $\text{DMSO}-d_6$ )

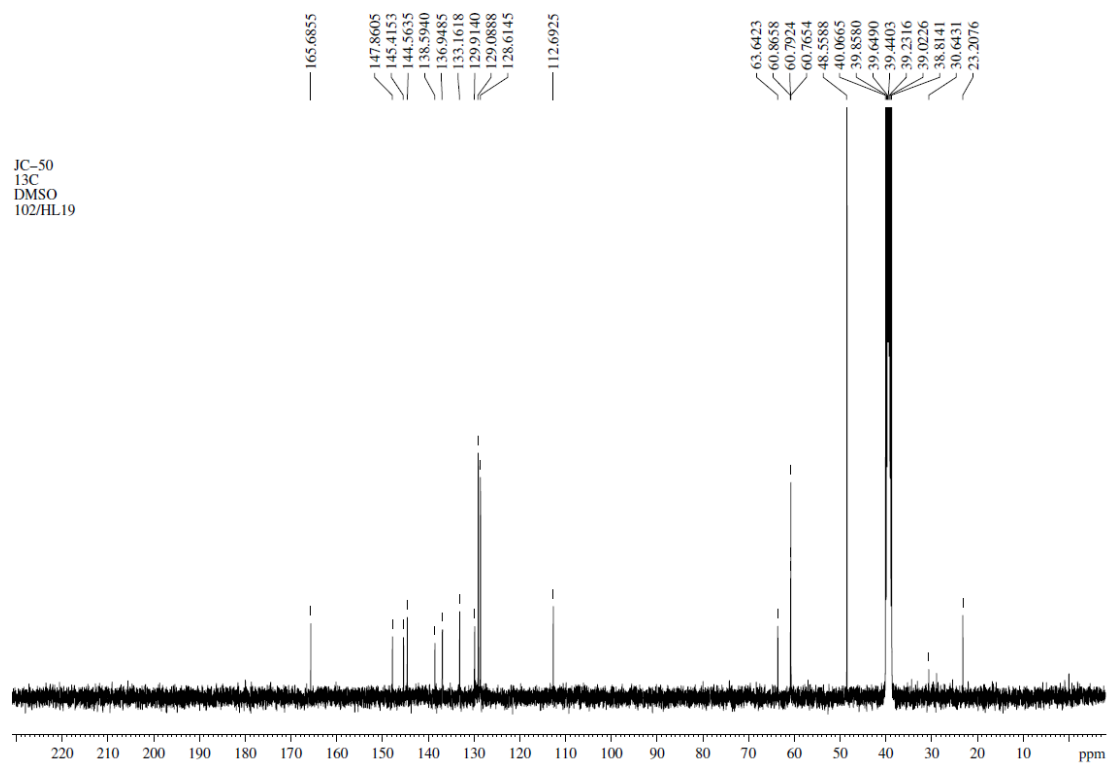

**Figure S32**  $^{13}\text{C}$ -NMR spectrum for Compound **3**

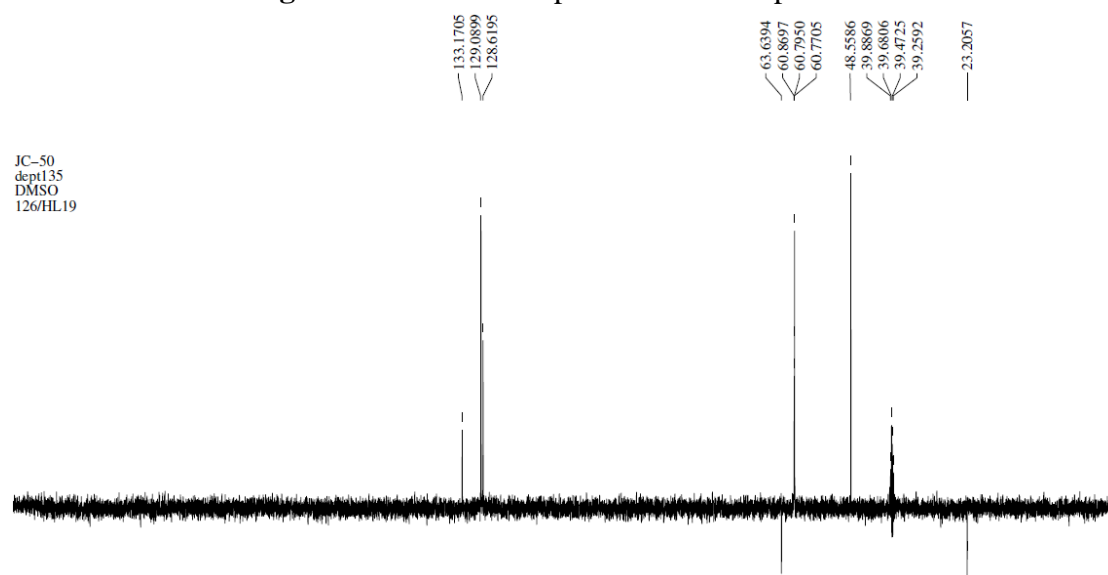

**Figure S33** DEPT135 spectrum for Compound **3**

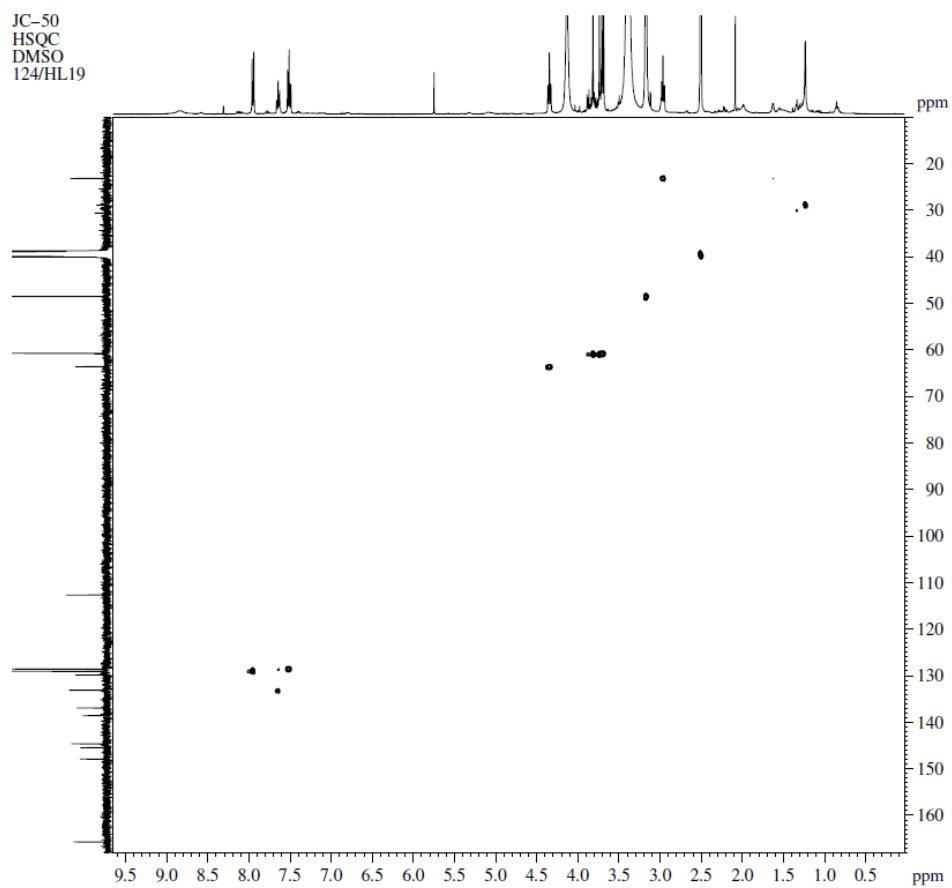

**Figure S34** HSQC spectrum for Compound **3**

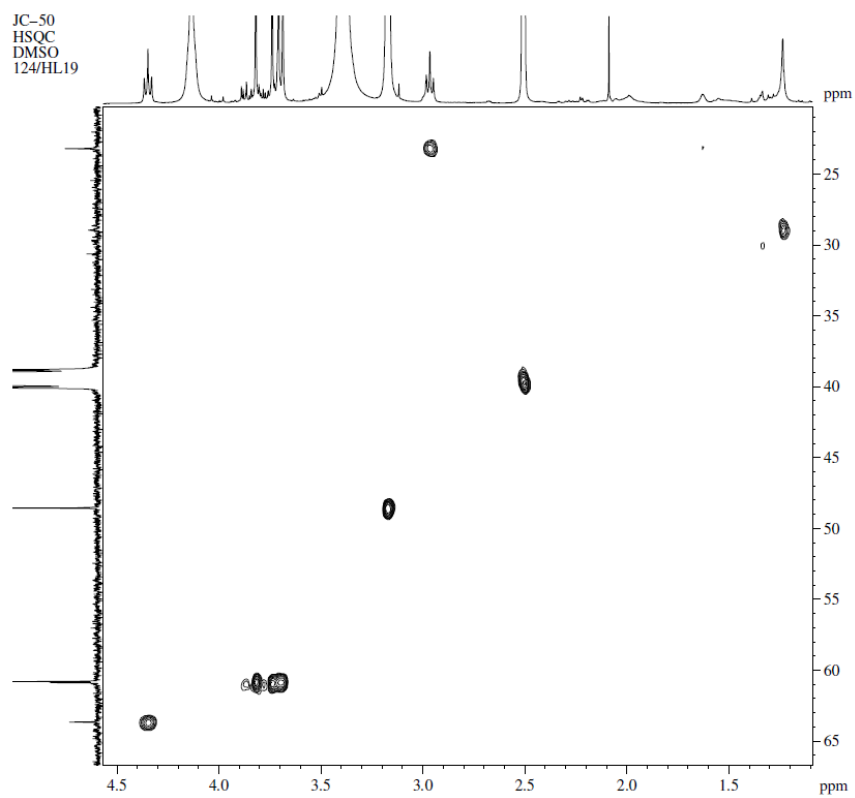

**Figure S35** HSQC spectrum for Compound **3-a**



JC-50  
HSQC  
DMSO  
124/HL19

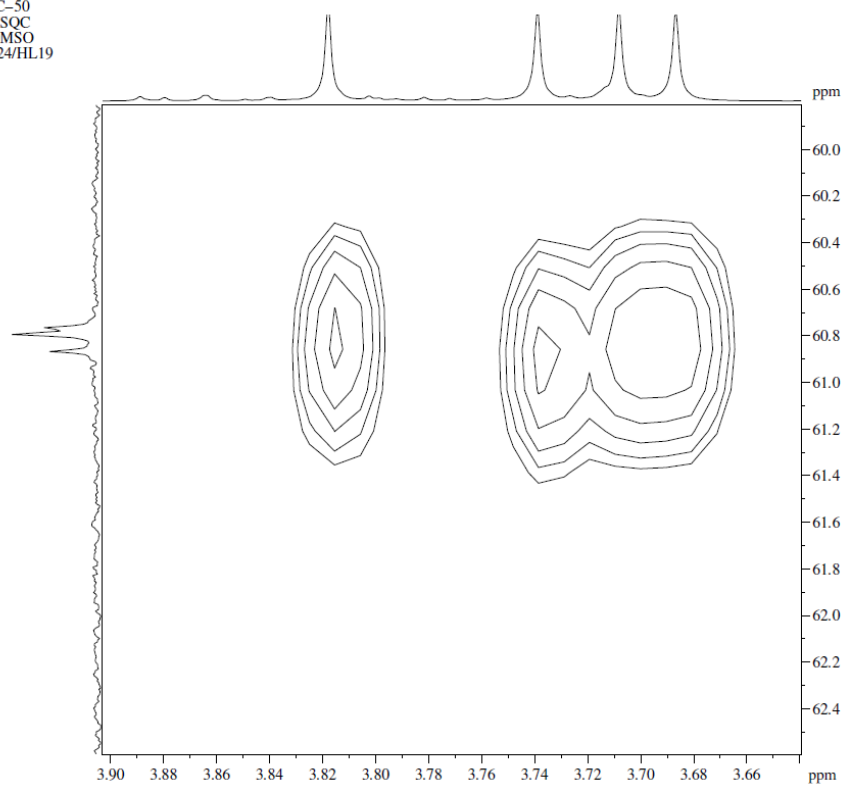

**Figure S36** HSQC spectrum for Compound **3-b**

JC-50  
HMBC  
DMSO  
125/HL19

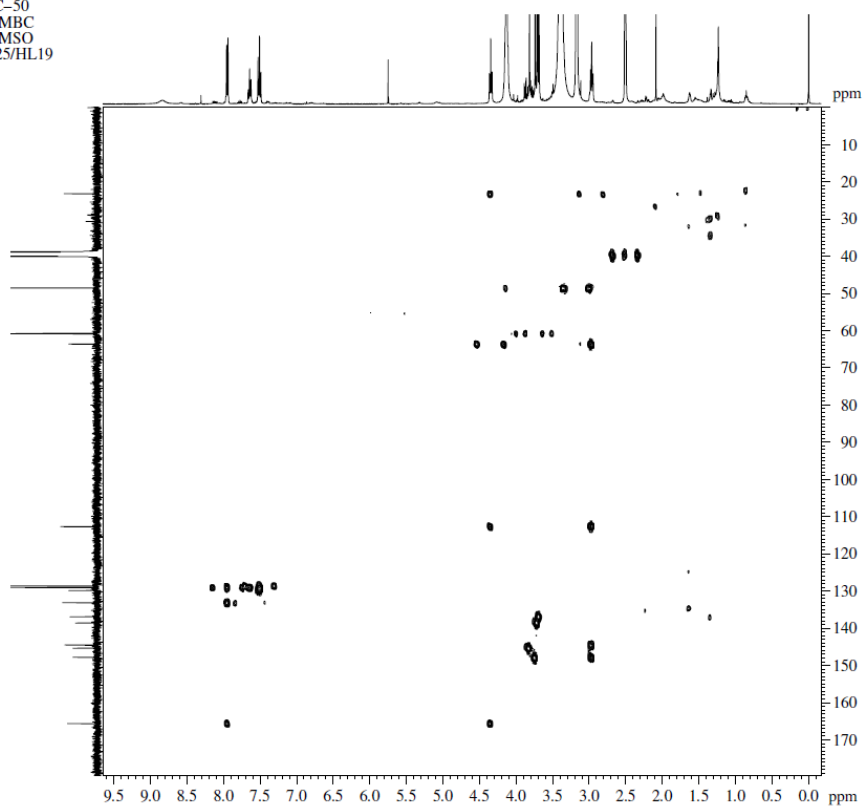

**Figure S37** HMBC spectrum for Compound **3**

JC-50  
HMBC  
DMSO  
125/HL19

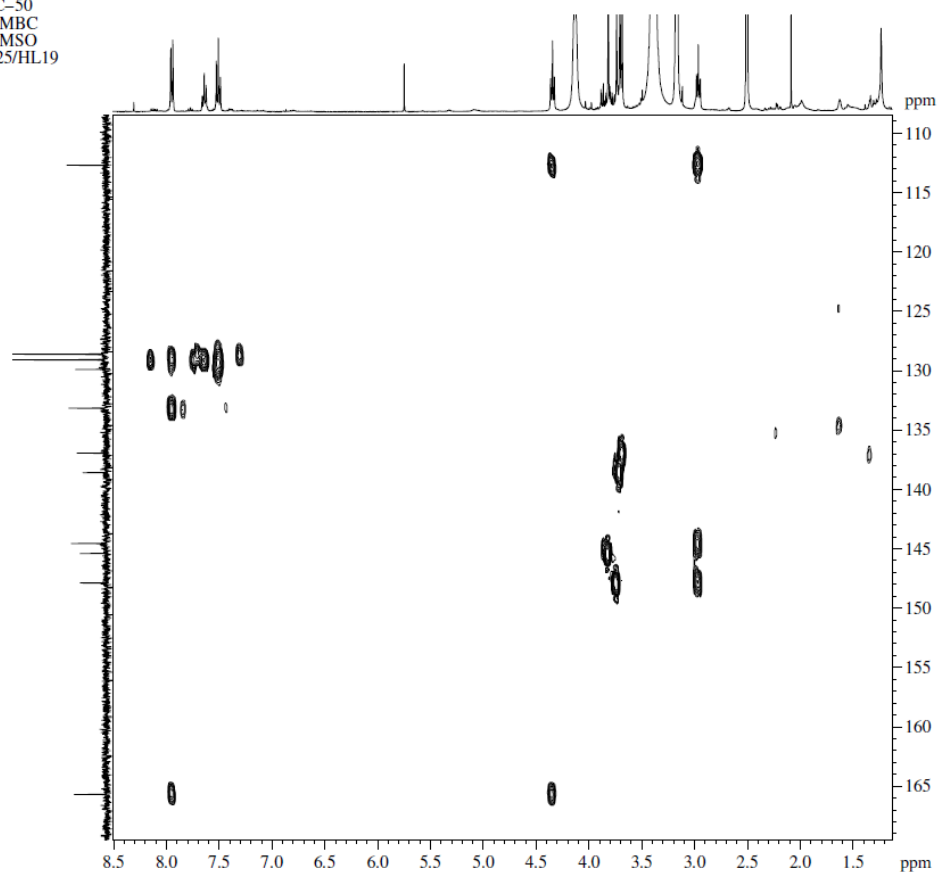

**Figure S38** HMBC spectrum for Compound **3-a**

JC-50  
HMBC  
DMSO  
125/HL19

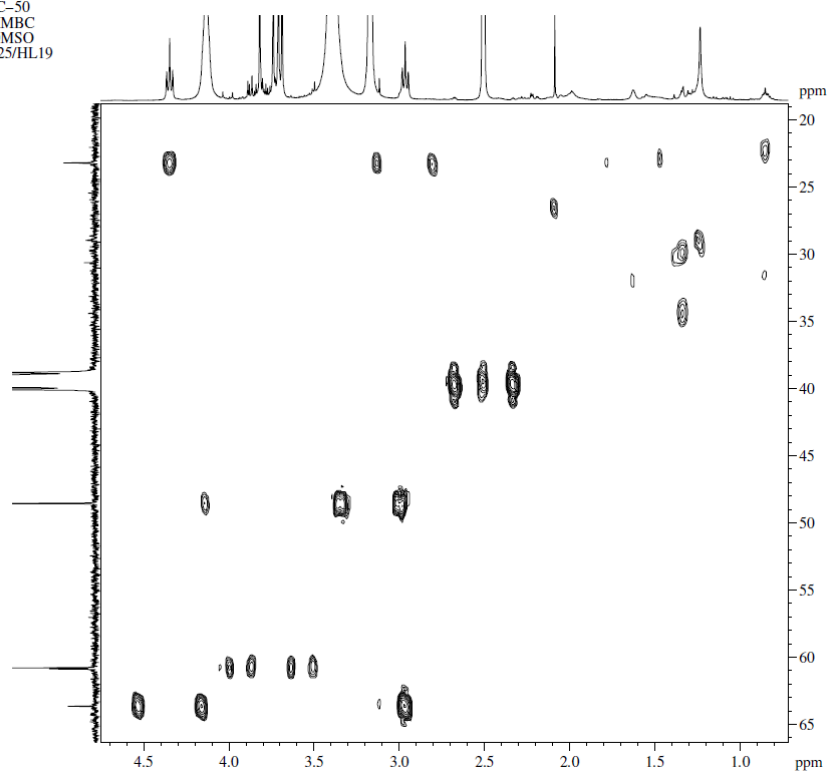

**Figure S39** HMBC spectrum for Compound **3-b**

JC-50  
NOESY  
DMSO  
130/HL19

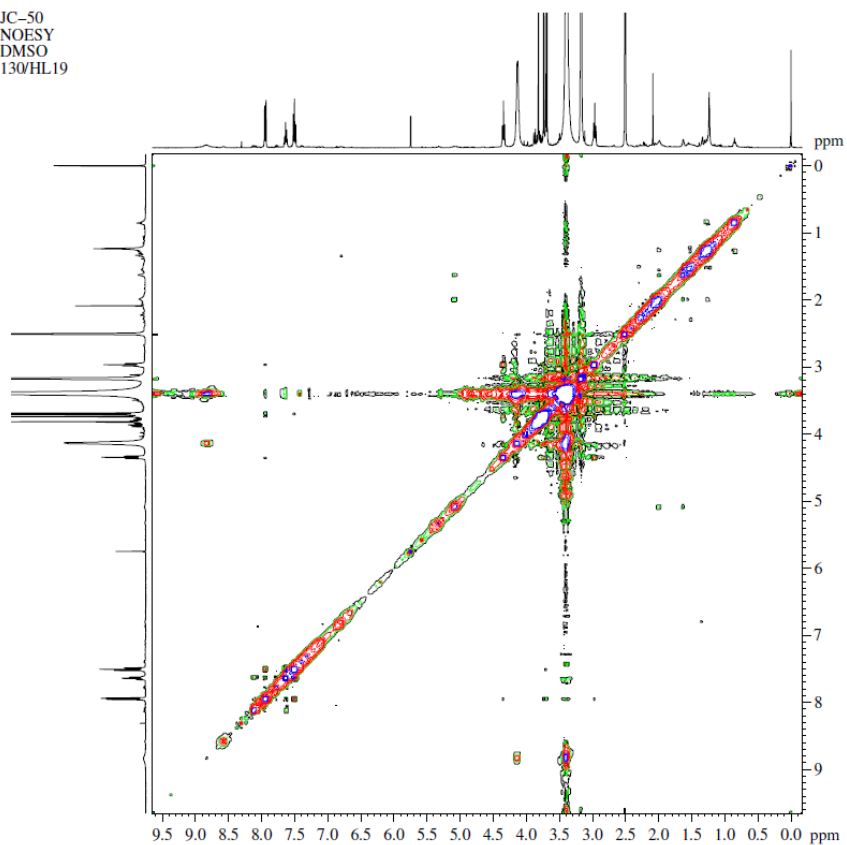

**Figure S40** NOESY spectrum for Compound **3** (DMSO- $d_6$ )

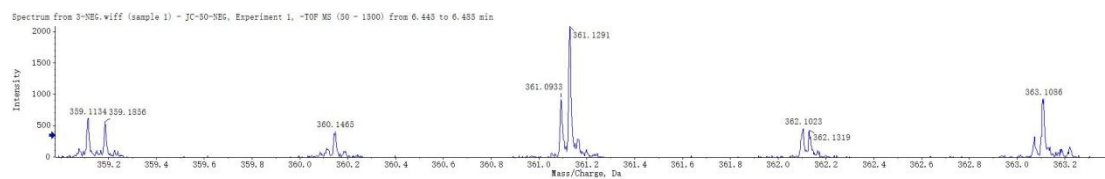

**Figure S41** MS spectrum for Compound **3**

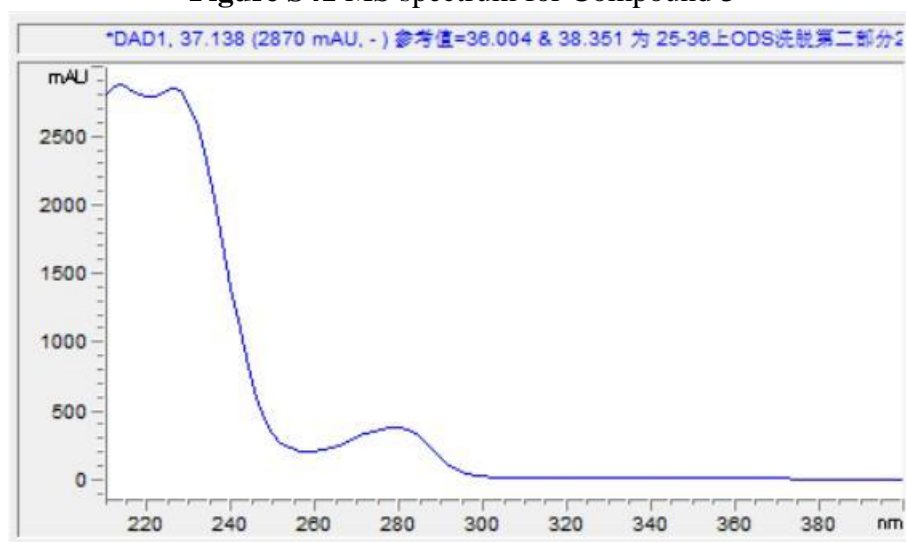

**Figure S42** UV spectrum for Compound **3**
